# Supplementary material for: Ecology and Genetic Lineages of Nasal Staphylococcus aureus and MRSA Carriage in Healthy Persons with or without Animal-Related Occupational Risks of Colonization: A Review of Global Reports
Source: MDPI journal article supplement (doi:10.3390/pathogens10081000), 2021-08-08
Supplement: s1 [file s1]

## SUPPLEMENTARY FILE

**Supplementary Table S1:** Study characteristics, species, antimicrobial resistance and virulence genes of Staphylococcal nasal carriage in healthy humans that did not report any risk factor of *S. aureus* colonization (n = 58)

| Author (s)<br>(reference)    | Staphylococcal species | Continent | Country/Subjects                     | Study design    | Sample size | No. of staphylococcal positive cases (%) | Detection method <sup>a</sup> | Detection of <i>S. aureus</i> (%) / MRSA (%) | <i>Staphylococcus</i> species (non- <i>aureus</i> ) detected (%) <sup>b</sup> | Antimicrobial resistance phenotype technique/ Major resistant types <sup>c</sup> | Antimicrobial resistance genes | Virulence genes           |
|------------------------------|------------------------|-----------|--------------------------------------|-----------------|-------------|------------------------------------------|-------------------------------|----------------------------------------------|-------------------------------------------------------------------------------|----------------------------------------------------------------------------------|--------------------------------|---------------------------|
| Elsanousi and Elsanousi [29] | <i>S. aureus</i>       | Africa    | Sudan/ Healthy people                | Cross-sectional | 220         | 180 (81.8)                               | C                             | 23 (10.5)/ NT                                | NR                                                                            | NT                                                                               | NT                             | NT                        |
| Ogefere and Ogunleye [30]    | <i>S. aureus</i>       | Africa    | Nigeria /Healthy students            | Cross-sectional | 400         | 229 (57.3)                               | C/PCR                         | 229 (57.3)/ 23 (5.8)                         | NT                                                                            | DD<br>FOX, OXA, ERY, GEN,                                                        | <i>mecA</i>                    | NT                        |
| Onanuga and Temedie [31]     | <i>S. aureus</i>       | Africa    | Nigeria /Healthy community residents | Cross-sectional | 120         | 40 (33.3)                                | C                             | 40 (33.3)/ 21 (17.5)                         | NA                                                                            | DD<br>OXA, AMP, ERY, DOX, CIP, VAN                                               | NT                             | NT                        |
| Nsofor <i>et al</i> [32]     | <i>S. aureus</i>       | Africa    | Nigeria/Healthy school children      | Cross-sectional | 270         | 152 (56.3)                               | C                             | 152 (56.3)/ NT                               | NA                                                                            | NT                                                                               | NT                             | NT                        |
| Anueyiagu <i>et al</i> [20]  | <i>S. aureus</i>       | Africa    | Nigeria/ Healthy students            | Prospective     | 130         | 83 (51.9)                                | C                             | 85 (51.9)/ 2 (1.5)                           | NA                                                                            | DD<br>OXA, ERY, GEN, STR, CIP, CHL                                               | NT                             | NT                        |
| Eibach <i>et al</i> [33]     | <i>S. aureus</i>       | Africa    | Ghana/Healthy children               | Cross-sectional | 544         | 120/ (22.1)                              | C/ PCR/ MT                    | 120/ (22.1)/ 2 (0.37)                        | NT                                                                            | FOX: DD<br>PEN, TET, CLI, ERY, GEN, SXT, DD                                      | <i>mecA</i>                    | <i>lukS/F-PV</i> , TSST-1 |
| Egyi <i>et al</i> [34]       | <i>S. aureus</i>       | Africa    | Ghana/ Healthy people                | Cross-sectional | 234         | 49 (21.0)                                | C/PCR                         | 49 (21.0)/ 2 (0.3)                           | NT                                                                            | DD<br>PEN, FOX, TET, ERY                                                         | <i>mecA</i>                    | <i>lukS/F-PV</i>          |
| Ngoa <i>et al</i> [35]       | <i>S. aureus</i>       | Africa    | Gabon/Healthy community              | Cross-sectional | 205         | 60 (29.2)                                | C/PCR/MT                      | 60 (29.2)/ 1 (0.49)                          | NT                                                                            | DD<br>PEN, ERY, CLO, CLI, TET                                                    | <i>mecA</i>                    | NT                        |
| Mourabit <i>et al</i> [36]   | <i>S. aureus</i>       | Africa    | Morocco/Healthy Volunteers           | Cross-sectional | 465         | 178 (38.3)                               | C / MALDI / PCR               | 178 (38.3)/ 21 (4.5)                         | NA                                                                            | DD<br>FOX, OXA, GEN, ERY, TET.                                                   | <i>mecA</i>                    | ND                        |

|                                      |                  |        |                                                                |                                        |                                                              |            |              |                                                                                |    |                                       |                                                                      |                 |
|--------------------------------------|------------------|--------|----------------------------------------------------------------|----------------------------------------|--------------------------------------------------------------|------------|--------------|--------------------------------------------------------------------------------|----|---------------------------------------|----------------------------------------------------------------------|-----------------|
| Tigabu <i>et al</i> [37]             | <i>S. aureus</i> | Africa | Ethiopia/<br>Healthy<br>Primary and<br>High School<br>students | Cross-<br>sectional                    | 640                                                          | 143 (22.3) | C            | 143 (22.3)/ 14<br>(2.2)                                                        | NA | DD<br>FOX, ERY, TET, CIP,<br>GEN      | NT                                                                   | NT              |
| Ebruke <i>et al</i> [38]             | <i>S. aureus</i> | Africa | Gambia/<br>Healthy people                                      | Cross-<br>sectional                    | 600                                                          | 151 (25.2) | C/PCR/MT     | 151 (25.2)/ 0 (0.0)                                                            | NT | DD<br>SXT, TET                        | ND                                                                   | NT              |
| El-Mahdy <i>et al</i> [39]           | <i>S. aureus</i> | Asia   | Saudi<br>Arabia/Healthy<br>adults                              | Prospecti<br>ve                        | 70                                                           | 26 (37.1)  | C / PCR / MT | 26 (37.1)/ 1 (1.4)                                                             | NA | DD<br>AMP, AMC, ERY                   | <i>mecA</i>                                                          | NT              |
| Al-Haj <i>et al</i> [40]             | <i>S. aureus</i> | Asia   | Yemen/Healthy<br>students                                      | Cross-<br>sectional                    | 450                                                          | 104 (23.1) | C            | 104 (23.1)/NR                                                                  | NA | DD<br>AMX, ERY, CIP,<br>CHL, GEN      | NA                                                                   | NA              |
| Soltani <i>et al</i> [41]            | <i>S. aureus</i> | Asia   | Iran/Healthy<br>Children                                       | Cross-<br>sectional                    | 350                                                          | 92 (26.2)  | C            | 92 (26.2)/ 33 (9.4)                                                            | NA | DD<br>OXA, CIP, CLI, VAN              | NT                                                                   | NT              |
| Khorvash <i>et al</i> [42]           | <i>S. aureus</i> | Asia   | Iran/Healthy<br>Adult                                          | Cross-<br>sectional                    | 158                                                          | 42 (26.6)  | C            | 42 (26.6)/ 5 (11.9)                                                            | NA | DD<br>PEN, OXA, TET,<br>ERY, DOX, RIF | NT                                                                   | NT              |
| Mobasherizadeh<br><i>et al</i> [43]. | <i>S. aureus</i> | Asia   | Iran/Healthy<br>children                                       | Cross-<br>sectional                    | 410                                                          | 115 (28.0) | C/PCR        | 115 (28.0)/25<br>(6.1)                                                         | NA | DD<br>FOX, ERY, PEN,<br>TET, CLI, CIP | <i>mecA</i>                                                          | <i>eap</i>      |
| Al-Shami and<br>Al-Shammari<br>[44]  | <i>S. aureus</i> | Asia   | Iraq/ Healthy<br>students                                      | Prospecti<br>ve                        | 71                                                           | 15 (21.1)  | C            | 15 (21.1)/<br>11(15.5)                                                         | NA | DD<br>PEN, FOX, ERY,<br>VAN           | NT                                                                   | NT              |
| Rasheed and<br>Hussain [45]          | <i>S. aureus</i> | Asia   | Iraq/Heathy<br>refugees and<br>host<br>communities             | Comparat<br>ive<br>Cross-<br>sectional | 492<br>heathy<br>and 355<br>host<br>communi<br>ty<br>members | NR         | C / PCR      | NR/76 (15.4) and<br>NR/49 (13.8)<br>refugees and<br>community,<br>respectively | NA | DD<br>GEN, ERY, CIP, STR,<br>CHL      | <i>mecA</i> : 98.7% in<br>host community<br>and 85.7% in<br>refugees | NT              |
| Suvarnsit <i>et al</i> [46]          | <i>S. aureus</i> | Asia   | Thailand/<br>Healthy<br>volunteers                             | Prospecti<br>ve                        | 100                                                          | 20 (20.0)  | C            | 20 (20.0)/0 (0.0)                                                              | NA | DD<br>OXA                             | NT                                                                   | NT              |
| Chen <i>et al</i> [47]               | <i>S. aureus</i> | Asia   | China/ Healthy<br>community                                    | Cross-<br>sectional                    | 295                                                          | 73 (24.7)  | C / PCR      | 73 (24.7)/ 1 (0.3)                                                             | NA | DD<br>FOX                             | <i>mecA</i>                                                          | <i>sea, seb</i> |

|                                  |                  |        |                                    |                 |       |                |             |                         |                 |                              |                                             |                  |
|----------------------------------|------------------|--------|------------------------------------|-----------------|-------|----------------|-------------|-------------------------|-----------------|------------------------------|---------------------------------------------|------------------|
| Gong <i>et al</i> [48]           | <i>S. aureus</i> | Asia   | China/ Healthy children            | Cross-sectional | 314   | 16 (5.10)      | C/ PCR      | 16 (5.10) / 3 (0.95)    | NT              | DD                           | <i>mecA</i>                                 | <i>lukS/F-PV</i> |
| Yan <i>et al</i> [49]            | <i>S. aureus</i> | Asia   | China/Healthy adults               | Cohort          | 2448  | 403 (16.3)     | C/ PCR/ MT  | 403 (16.3)/8 (0.33)     | NA <sup>d</sup> | OXA, CLI, CIP                | <i>mecA</i>                                 | <i>lukS/F-PV</i> |
| Jamil <i>et al</i> [50]          | <i>S. aureus</i> | Asia   | Pakistan/ Healthy people           | Cross-sectional | 200   | 41 (20.5)      | C           | 41 (20.5)/ 0 (0.0)      | NT              | NT <sup>d</sup>              | NT                                          | NT               |
| Chatterjee <i>et al</i> [51]     | <i>S. aureus</i> | Asia   | India/ healthy children            | Cross-sectional | 489   | C/PCR/MT       | 256 (52.5)  | 256 (52.5)/16 (3.27)    | NT              | DD                           | PEN, OXA, ERY, CIP, SXT                     | NT               |
| Fomda <i>et al</i> [52]          | <i>S. aureus</i> | Asia   | India/ healthy people              | Cross-sectional | 820   | C/PCR          | 229 (27.92) | 229 (27.92) /15 (1.8)   | NT              | DD                           | <i>mecA</i>                                 | NT               |
| Choi <i>et al</i> [53]           | <i>S. aureus</i> | Asia   | Malaysia/ Healthy adults           | Cross-sectional | 346   | 81 (23.4)      | C           | 81 (23.4)/ 1 (0.29)     | NT              | DD                           | PEN, AMP, OXA, FOX, CIP, SXT, DOX, CHL, TET | NT               |
| Anbazhagan <i>et al</i> [54]     | <i>S. aureus</i> | Asia   | Malaysia/ Healthy students         | Cross-sectional | 147   | 117 (79.6)     | C           | 117 (79.6)/ 21 (13.9)   | NA              | DD                           | <i>mecA</i>                                 | NT               |
| Wang <i>et al</i> [55]           | <i>S. aureus</i> | Asia   | Taiwan/ healthy students           | Cross-sectional | 259   | 58 (22.4)      | C/PCR/MT    | 58 (22.4) / 4 (1.5)     | NT              | OXA                          | <i>mecA</i>                                 | ND               |
| Dinić <i>et al</i> [56]          | <i>S. aureus</i> | Europe | Serbia / healthy Adults & children | Cohort          | 58908 | 1381 (2.34)    | C           | 1381 (2.34)/ 123 (0.21) | NA              | DD                           | OXA                                         | NT               |
| Ritchie <i>et al</i> [57]        | <i>S. aureus</i> | Europe | Germany/ healthy students          | Prospective     | 122   | 69 (57.0)      | C / MT      | 69 (57.0)/ NT           | NA              | DD                           | PEN, FOX, ERY, CLI                          | NT               |
| Andersen <i>et al</i> [58]       | <i>S. aureus</i> | Europe | Denmark/ healthy population        | Prospective     | 2196  | 543 (24.7)     | C/PCR       | 543 (24.7)/ NR          | NA              | NT                           | NT                                          | NT               |
| Karapsias <i>et al</i> [59]      | <i>S. aureus</i> | Europe | Greece/ Healthy Air force staff    | Cohort          | 959   | MRSA: 9 (0.94) | C/PCR/MT    | NR/ 9 (0.94)            | NA              | NT                           | <i>mecA</i>                                 | <i>lukS/F-PV</i> |
| Kirkliauskienė <i>et al</i> [60] | <i>S. aureus</i> | Europe | Denmark/Healthy persons            | Cross-sectional | 537   | 273 (50.8)     | C/PCR       | 273 (50.8)/ 0 (0.00)    | NA              | DD                           | NT                                          | <i>lukS/F-PV</i> |
|                                  |                  |        |                                    |                 |       |                |             |                         |                 | PEN, OXA, FOX, TET, CLI, ERY |                                             |                  |

|                              |                  |        |                             |                 |      |             |            |                     |    |                                                    |             |                                  |
|------------------------------|------------------|--------|-----------------------------|-----------------|------|-------------|------------|---------------------|----|----------------------------------------------------|-------------|----------------------------------|
| Mehraj <i>et al</i> [61]     | <i>S. aureus</i> | Europe | Germany / healthy people    | Cross-sectional | 389  | 85 (21.9)   | C /PCR/MT  | 85 (21.9)/5 (1.3)   | NT | DD<br>PEN, OXA, CIP,<br>MFL, ERY, CLI              | <i>mecA</i> | NT                               |
| den Heijer <i>et al</i> [62] | <i>S. aureus</i> | Europe | Austria/ healthy people     | Cross-sectional | 3309 | 549 (16.6)  | C /PCR/MT  | 549 (16.6)/ 8 (0.2) | NT | DD<br><br>PEN, OXA, CIP,<br>AZT, CLIN, GEN,<br>TET | <i>mecA</i> | NT                               |
| den Heijer <i>et al</i> [62] | <i>S. aureus</i> | Europe | Belgium/ healthy people     | Cross-sectional | 3025 | 584 (19.3)  | C /PCR/MT  | 584 (19.3)/12 (0.4) | NT | DD<br><br>PEN, OXA, CIP,<br>AZT, CLIN, GEN,<br>TET | <i>mecA</i> | NT                               |
| den Heijer <i>et al</i> [62] | <i>S. aureus</i> | Europe | Croatia/ healthy people     | Cross-sectional | 3960 | 792 (20.0)  | C /PCR/MT  | 792 (20.0)/15 (0.4) | NT | DD<br><br>PEN, OXA, CIP,<br>AZT, CLIN, GEN,<br>TET | <i>mecA</i> | NT                               |
| den Heijer <i>et al</i> [62] | <i>S. aureus</i> | Europe | France/ healthy people      | Cross-sectional | 3858 | 876 (22.7)  | C /PCR/MT  | 876 (22.7)/16 (0.4) | NT | DD<br><br>PEN, OXA, CIP,<br>AZT, CLIN, GEN,<br>TET | <i>mecA</i> | NT                               |
| den Heijer <i>et al</i> [62] | <i>S. aureus</i> | Europe | Hungary/ healthy people     | Cross-sectional | 3847 | 542 (14.1)  | C /PCR/MT  | 542 (14.1)/8 (0.2)  | NT | DD<br><br>PEN, OXA, CIP,<br>AZT, CLIN, GEN,<br>TET | <i>mecA</i> | NT                               |
| den Heijer <i>et al</i> [62] | <i>S. aureus</i> | Europe | Netherlands/ healthy people | Cross-sectional | 3847 | 1073 (27.9) | C /PCR/MT  | 1073 (27.9)/9 (0.2) | NT | DD<br><br>PEN, CIP, AZT,<br>CLIN, GEN, TET,<br>OXA | <i>mecA</i> | NT                               |
| den Heijer <i>et al</i> [62] | <i>S. aureus</i> | Europe | Spain/ healthy people       | Cross-sectional | 3990 | 770 (19.3)  | C /PCR/MT  | 770 (19.3)/10 (0.3) | NT | DD<br><br>PEN, CIP, OXA,<br>AZT, CLIN, GEN,<br>TET | <i>mecA</i> | NT                               |
| den Heijer <i>et al</i> [62] | <i>S. aureus</i> | Europe | Sweden/ healthy people      | Cross-sectional | 3214 | 958 (29.8)  | C /PCR/MT  | 958 (29.8)/ 0 (0.0) | NT | DD<br><br>PEN, CIP, OXA,AZT,<br>CLIN, GEN, TET     | ND          | NT                               |
| den Heijer <i>et al</i> [62] | <i>S. aureus</i> | Europe | UK/ healthy people          | Cross-sectional | 3156 | 814 (25.8)  | C /PCR/MT  | 814 (25.8)/13 (0.4) | NT | DD<br><br>PEN, CIP, AZT,<br>CLIN,GEN, TET          | <i>mecA</i> | NT                               |
| Becker <i>et al</i> [63]     | <i>S. aureus</i> | Europe | Germany/ healthy people     | Cross-sectional | 1878 | C/PCR/MT    | 920 (40.9) | 920 (40.9)/15 (0.8) | NT | DD<br><br>PEN, CIP, OXA,AZT,<br>CLIN, GEN, TET     | <i>mecA</i> | <i>tst, sec, seg, sei, lukFS</i> |

|                                     |                  |             |                                         |                     |      |             |                                                              |            |                           |    |                                                    |                                                     |                                                                                  |
|-------------------------------------|------------------|-------------|-----------------------------------------|---------------------|------|-------------|--------------------------------------------------------------|------------|---------------------------|----|----------------------------------------------------|-----------------------------------------------------|----------------------------------------------------------------------------------|
|                                     |                  |             |                                         |                     |      |             |                                                              |            |                           |    | FOX, LEV, TET,<br>SXT, CLI, ERY, TET               |                                                     |                                                                                  |
| Netsvyetayeva<br><i>et al</i> [64]  | <i>S. aureus</i> | Europe      | Ukraine/<br>healthy people              | Cross-<br>sectional | 245  | C/PCR/MT    |                                                              | 99 (40.4)  | 99 (40.4)/ 9 (3.7)        |    | DD<br>FOX, GEN, SXT,<br>TET, CIP, RIF, ERY,<br>CLI | <i>mecA</i>                                         | <i>lukPV eta etb<br/>etd fnbA</i>                                                |
| Falomir <i>et al</i><br>[65]        | <i>S. aureus</i> | Europe      | Spain/Healthy<br>university<br>students | Cross-<br>sectional | 203  | 45 (22.2)   | C                                                            |            | 45 (22.2)/0 (0.0)         | NT | DD                                                 | NT                                                  | NT                                                                               |
| Tiera <i>et al</i> [66]             | <i>S. aureus</i> | Europe      | Spain/Healthy<br>students               | Cross-<br>sectional | 102  | 14 (13.7)   | C                                                            |            | 14 (13.7)/ 6 (5.9)        | NT | FOX<br>DD                                          | NT                                                  | NT                                                                               |
| Lozano <i>et al</i><br>[67]         | <i>S. aureus</i> | Europe      | Spain/Healthy<br>persons                | Cross-<br>sectional | 278  | 53 (19.1)   | C/PCR/ MT                                                    |            | 53 (19.1)/ 1 (0.36)       | NA | OXA<br>DD                                          | <i>mecA, msr(A),<br/>erm(A), erm(C),<br/>erm(T)</i> | <i>eta, hla, hld,<br/>hlg-2, hlg, seb,<br/>tst-1, sea, sep</i>                   |
| Muthukrishnan<br><i>et al</i> [68]  | <i>S. aureus</i> | Americ<br>a | USA/Healthy<br>persons                  | Prospecti<br>ve     | 109  | 61 (55.9)   | C / MT                                                       |            | 61 (55.9)/ 7 (11.5)       | NA | PEN, OXA, FOX,<br>CIP, ERY<br>DD                   | <i>mecA</i>                                         | NT                                                                               |
| Velasco <i>et al</i><br>[69]        | <i>S. aureus</i> | Americ<br>a | USA/Healthy<br>people                   | Cross-<br>sectional | 550  | 42 (7.6)    | C/PCR/MT                                                     |            | 42 (7.6)/ 0 (0.0)         | NA | FOX<br>DD                                          | ND                                                  | ND                                                                               |
| Kuehnert <i>et al</i><br>[70]       | <i>S. aureus</i> | Americ<br>a | USA/Healthy<br>people                   | Cross-<br>sectional | 9622 | 3117 (32.4) | C/PCR                                                        |            | 3117 (32.4)/77<br>(0.8)   | NT | PEN, TET, ERY, CIP,<br>KAN,<br>DD                  | <i>mecA</i>                                         | <i>Sea, seb, sec,<br/>sed, seg, seh,<br/>TSST-1,<br/>lukS/F-PV<br/>lukS/F-PV</i> |
| Gorwitz <i>et al</i><br>[71]        | <i>S. aureus</i> | Americ<br>a | USA/Healthy<br>people                   | Cross-<br>sectional | 9004 | 2575 (28.6) | C/PCR                                                        |            | 2575 (28.6) /135<br>(1.5) | NT | PEN, OXA, TET,<br>ERY, LEV<br>NT                   | <i>mecA</i>                                         |                                                                                  |
| Wardyn <i>et al</i><br>[72]         | <i>S. aureus</i> | Americ<br>a | USA/Healthy<br>community<br>members     | Cohort              | 1342 | 156 (22.5)  | C/PCR/MT                                                     |            | 156 (22.5)/ 19<br>(2.7)   | NA | DD                                                 | <i>mecA</i>                                         | <i>lukS/F-PV</i>                                                                 |
| Wardyn <i>et al</i><br>[73]         | <i>S. aureus</i> | Americ<br>a | USA/Healthy<br>rural<br>community       | Cross-<br>sectional | 131  | 31 (23.7)   | C/ PBP2a<br>Immnoaggluti<br>nation<br>/PCR/MT<br>C /PCR / MT |            | 31 (23.7)/ 0 (0.0)        | NA | OXA, ERY, TET, CLI<br>DD                           | ND                                                  | <i>lukS/F-PV</i>                                                                 |
| Pires <i>et al.</i> [74]            | <i>S. aureus</i> | Americ<br>a | Brazil/Healthy<br>community             | Cross-<br>sectional | 686  | 224 (32.7)  |                                                              |            | 224 (32.7)/ 6 (0.9)       | NA | PEN, ERY, SXT,<br>LEV, CLI<br>DD                   | All MRSA<br>harbored<br><i>mecA</i>                 | NA                                                                               |
| Braga <i>et al</i> [75]             | <i>S. aureus</i> | Americ<br>a | Barzil/ healthy<br>children             | Cross-<br>sectional | 500  | C/PCR       |                                                              | 240 (48.0) | 240 (48.0)/ 31<br>(6.2)   | NT | FOX<br>DD                                          | <i>mecA</i>                                         | NT                                                                               |
| Hamdan-Partida<br><i>et al</i> [76] | <i>S. aureus</i> | Americ<br>a | Mexico/ healthy<br>people               | Cross-<br>sectional | 1243 | C/PCR       |                                                              | 296 (23.9) | 296 (23.9)/ 48<br>(3.9)   | NT | OXA, FOX<br>DD                                     | <i>mecA</i>                                         | NT                                                                               |
|                                     |                  |             |                                         |                     |      |             |                                                              |            |                           |    | FOX, PEN, ERY, CLI,<br>TET, CIP, SXT               |                                                     |                                                                                  |

|                                 |                  |           |                                                  |                 |     |            |                                    |                      |                                                                                                |                                                                                             |                     |                          |
|---------------------------------|------------------|-----------|--------------------------------------------------|-----------------|-----|------------|------------------------------------|----------------------|------------------------------------------------------------------------------------------------|---------------------------------------------------------------------------------------------|---------------------|--------------------------|
| Rebollo-Pérez <i>et al</i> [77] | <i>S. aureus</i> | America   | Colombia/Healthy preschool children              | Cross-sectional | 104 | 40 (38.5)  | C / PCR / MT                       | 40 (38.5)/ 5 (4.8)   | NA                                                                                             | DD<br>FOX, ERY, CLI, GEN, RIF                                                               | <i>mecA</i>         | NT                       |
| Hanselman <i>et al</i> [78]     | <i>S. aureus</i> | America   | Canada/Healthy school teachers                   | Prospective     | 220 | NR         | C/PCR/PBP2a immunoagglutination/MT | 79 (35.9) /7 (3.2)   | NA                                                                                             | OXA                                                                                         | NT                  | <i>lukS/F-PV</i>         |
| Gardella <i>et al</i> [79]      | <i>S. aureus</i> | America   | Argentina/Healthy children                       | Cross-sectional | 316 | 98 (31.0)  | C/PCR/MT                           | 98 (31.0)/ 14 (4.4)  | NT                                                                                             | DD<br>ERY, CLI, RIF                                                                         | <i>mecA</i>         | <i>lukS/F-PV</i> and sea |
| Munckhof <i>et al</i> [80]      | <i>S. aureus</i> | Australia | Australia/Healthy volunteers                     | Prospective     | 303 | 96 (31.7)  | C / PCR                            | 96 (31.7)/0 (0.0)    | NA                                                                                             | DD<br>OXA                                                                                   | ND                  | NT                       |
| Ogefere <i>et al</i> [81]       | CoPS and CoNS    | Africa    | Nigeria/Healthy students                         | Cross-sectional | 350 | 220 (62.9) | C                                  | 148 (42.3)/ NT       | NR                                                                                             | NT                                                                                          | NT                  | NT                       |
| Abadi <i>et al</i> [82]         | CoPS and CoNS    | Asia      | Iran/Healthy school students                     | Cross-sectional | 600 | 539 (89.8) | C / PCR                            | 109 (18.2)/ 46 (7.7) | SL (29), SHae(24) SSa(23.6), SE (12.5), SSli(11.1)                                             | DD<br>FOX                                                                                   | <i>mecA</i>         | NT                       |
| Falomir <i>et al</i> [83]       | CoPS and CoNS    | Europe    | Spain/Healthy older persons (average 63.7 years) | Cross-sectional | 27  | 4 (15.0)   | C                                  | 4 (15.0)/ 1 (3.7)    | MR-isolates: 72 (16.7) MRCoNS were identified. SSa had the highest MR rate. SW, Spa, SKi , Sxy | DD<br>( <i>S. aureus</i> )<br>PEN, OXA<br>CLI<br><br>(CoNS)<br>PEN, OXA, TET, CLA, RIF, CIP | NT                  | NT                       |
| Falomir <i>et al</i> [84]       | CoPS and CoNS    | Europe    | Spain/Healthy university students                | Cross-sectional | 445 | 99 (22.2)  | C                                  | 99 (22.2)/6 (1.3)    | Sin, SSa, SCa, SKI, SW.                                                                        | DD                                                                                          | NT                  | NT                       |
| Lebeaux <i>et al</i> [85]       | CoNS             | Europe    | France / Healthy community                       | Cross-sectional | 154 | 72 (46.7)  | C/PCR/MT                           | 34 (21.5)/ 2 (1.29)  | SE (21.4), Shae (27), SH (18.3), SSa (16.2)                                                    | OXA, ERY, MUP<br>NT                                                                         | <i>mecA</i> in MRSA | NT                       |

---

<sup>a</sup> Detection method: C/MALDI/PCR/MT: Culture / MALDI-TOF-MS / PCR / Molecular typing

<sup>b</sup> SE: *S. epidermidis*; SHae: *S. haemolyticus*; SSa: *S. saprophyticus*; SL: *S. lugdunensis*; SCa: *S. capitis*; SC: *S. cohini*; SH: *S. hominis*; SHy: *S. hyicus*; SCs: *S. caseolyticus*; SSi: *S. simulans*; SD: *S. delphini*; SSli: *S. schleiferi* SW: *S. warnieri*; SPas: *S. pasteurii*.

<sup>c</sup>Technique used: Disk-diffusion method (DD-method), MIC determination (MIC). Top 4 groups of antimicrobial agents: beta-lactams (BL). Fluoroquinolones (FQ), Macrolides (Mc), Tetracycline (Tet), Vancomycin (Van)

<sup>d</sup>NT: Not tested

NA: Not available (tested but result not published on article)

ND: Not detected

NR: Not reported in detail

PEN: Penicillin; AMX: Amoxicillin; ERY: Erythromycin; CHL: Chloramphenicol; CLI: Clindamycin; STR: Streptomycin; Van: vancomycin; TET: Tetracycline; OXA: Oxacillin; RIF: Rifampicin, FOX: Cefoxitin; LEV: Levofloxacin; CIP: Ciprofloxacin; KAN: Kanamycin; GEN: Gentamycin; MUP: Mupirocin; SXT: Trimethoprim/sulfamethoxazole

**Supplementary Table S2.** Study characteristics, species, antimicrobial resistance pattern and virulence genes detected in staphylococcal nasal isolates recovered from healthy food-handlers (n = 31).

| Author (s)<br>(reference)        | Staphylococcal<br>species | Continent | Country/<br>Subjects                                         | Study<br>design     | Sample<br>size | No. of<br>Staphylococcal<br>Positive<br>Cases (%) | Detection method<br>C/MALDI/PCR/<br>MT <sup>a</sup>         | Detection of <i>S.<br/>aureus</i> (%)/<br>MRSA (%) | <i>Staphylococcus<br/>species</i> (non-<br><i>aureus</i> )<br>detected (%) <sup>b</sup> | Antimicrobial Resistance<br>phenotype<br>Technique/ Major<br>resistant types <sup>c</sup> | Antimicrobial<br>Resistance genes | Virulence genes           |
|----------------------------------|---------------------------|-----------|--------------------------------------------------------------|---------------------|----------------|---------------------------------------------------|-------------------------------------------------------------|----------------------------------------------------|-----------------------------------------------------------------------------------------|-------------------------------------------------------------------------------------------|-----------------------------------|---------------------------|
| El-Shenawy<br><i>et al</i> [86]  | <i>S. aureus</i>          | Africa    | Egypt /<br>heathy<br>Food<br>handlers                        | Cross-<br>sectional | 200            | 61 (30.5)                                         | C /STE- Reverse<br>Passive Latex<br>Agglutination<br>(RPLA) | 23 (10.5)/NT                                       | NA                                                                                      | NT                                                                                        | NA                                | <i>sea, seb, sec, sed</i> |
| Dagnew <i>et al</i><br>[87]      | <i>S. aureus</i>          | Africa    | Ethiopia/<br>Food<br>handlers                                | Cross-<br>sectional | 200            | 41 (20.5)                                         | C                                                           | 41 (20.5) /NT                                      | NT                                                                                      | NT                                                                                        | NT                                | NT                        |
| Beyene <i>et al</i><br>[88]      | <i>S. aureus</i>          | Africa    | Ethiopia/<br>food<br>handlers                                | Cross-<br>sectional | 300            | 52 (17.3)                                         | C                                                           | 52 (17.3) /4 (1.3)                                 | NT                                                                                      | DD<br>OXA                                                                                 | NT                                | NT                        |
| Ahmad [89]                       | <i>S. aureus</i>          | Africa    | Sudan/<br>Food<br>Handlers                                   | Cross-<br>sectional | 372            | 93 (25.0)                                         | C/PCR                                                       | 93 (25) / 39 (10.2)                                | NT                                                                                      | NT                                                                                        | NT                                | <i>sea, seb, sec, sed</i> |
| Al Hassan <i>et al</i><br>[90]   | <i>S. aureus</i>          | Africa    | Sudan/<br>Universit<br>y<br>Cafeteria<br>s food-<br>handlers | Cross-<br>sectional | 80             | 16 (20)                                           | C                                                           | 16 (20.0) / 0 (0.0)                                | NT                                                                                      | DD<br>OXA                                                                                 | NT                                | NT                        |
| Emeakaroha<br><i>et al</i> [91]  | <i>S. aureus</i>          | Africa    | Nigeria /<br>food<br>handlers                                | Cross-<br>sectional | 54             | 21 (38.9)                                         | C                                                           | 21 (38.9) / NT                                     | NT                                                                                      | DD<br>PEN, TET, ERY, CIP                                                                  | NT                                | NT                        |
| Omololu-Aso<br><i>et al</i> [92] | <i>S. aureus</i>          | Africa    | Nigeria/<br>Food-<br>handlers                                | Cross-<br>sectional | 35             | 13 (37.1)                                         | C                                                           | 13 (37.1) / 13<br>(37.1)                           | NT                                                                                      | DD method<br>OXA                                                                          | NT                                | NT                        |
| Eke <i>et al</i> [93]            | <i>S. aureus</i>          | Africa    | Nigeria/<br>Food<br>handlers<br>and<br>restaurant<br>workers | Cross-<br>sectional | 100            | 60 (60.0)                                         | C                                                           | 60 (60.0)/ NT                                      | NT                                                                                      | DD<br>PEN, CIP, GEN, COT,<br>ERY                                                          | NT                                | NT                        |
| Abdulrahman<br>and Taher<br>[94] | <i>S. aureus</i>          | Asia      | Iraq/Food<br>handlers<br>(fast<br>food)                      | Cross-<br>sectional | 200            | 53 (26.5)                                         | C/PCR                                                       | 53 (26.5) /NT                                      | NA                                                                                      | NT                                                                                        | ND                                | NT                        |
| Mohammed<br>and Ali [95]         | <i>S. aureus</i>          | Asia      | Iraq/<br>Restaura                                            | Cross-<br>sectional | 100            | 30 (30.0)                                         | C                                                           | 30 (30.0) / 16<br>(16.0)                           | NT                                                                                      | DD                                                                                        | NT                                | NT                        |

|                               |                  |        | nt<br>workers                                                 |                               |       |            |                 |                         |    | OXA, FOX, CIP, GEN,<br>TET, CLI           |             |                                          |
|-------------------------------|------------------|--------|---------------------------------------------------------------|-------------------------------|-------|------------|-----------------|-------------------------|----|-------------------------------------------|-------------|------------------------------------------|
| Fooladvand <i>et al</i> [96]  | <i>S. aureus</i> | Asia   | Iran.<br>Food<br>handlers                                     | Cross-<br>sectional           | 1113  | C/PCR      | 224 (20.1)      | 224 (20.1)/ 37<br>(3.3) | NT | NT                                        | <i>mecA</i> | <i>ssei, seg, sea, seb,<br/>sec, seh</i> |
| Osman <i>et al</i> [97]       | <i>S. aureus</i> | Asia   | Lebanon<br>/ healthy<br>Food<br>handlers                      | Cross-<br>sectional           | 160   | 38 (23.8)  | C / Maldi / PCR | 38 (23.8)/ 5 (3.1)      | NA | DD<br><br>FOX                             | NT          | <i>sea, sec, sed, etb</i>                |
| Boost <i>et al</i> [98]       | <i>S. aureus</i> | Asia   | Hong<br>Kong/<br>Pork<br>Butchers                             | Cross-<br>sectional           | 300   | NR         | C/PCR/MT        | NR/17 (5.6)             | NT | DD<br>FOX                                 | <i>mecA</i> | NT                                       |
| Alhashimi <i>et al</i> [99]   | <i>S. aureus</i> | Asia   | Iran/<br>Food<br>handlers                                     | Cross-<br>sectional           | 332   | 99 (30.1)  | C/PCR           | 99 (30.1) / NA          | NA | NT                                        | NT          | <i>sea, seb, sec, sed,<br/>see</i>       |
| Noor-Azira <i>et al</i> [100] | <i>S. aureus</i> | Asia   | Malaysia/<br>Food<br>handlers                                 | Cross-<br>sectional           | 64    | 15 (23.4)  | C               | 15 (23.4)/ 0.0          | NT | DD<br><br>FOX                             | NT          | NT                                       |
| Wang <i>et al</i> [101]       | <i>S. aureus</i> | Asia   | China/<br>Pig-<br>related<br>farmers                          | Cross-<br>sectional           | 335   | 43 (12.8)  | C/PCR.MT        | 43 (12.8)/17 (5.1)      | NT | DD<br><br>PEN, FOX, PEN, ERY,<br>TET, CLI | <i>mecA</i> | <i>scn, chp, sak, sea</i>                |
| Ho <i>et al</i> [102]         | <i>S. aureus</i> | Asia   | Hong<br>Kong/<br>Raw<br>and/or<br>cooked<br>foods<br>handlers | Cross-<br>sectional           | 434   | 99 (22.8)  | C/PCR/ MT       | 99 (22.8) /5<br>(1.15)  | NT | DD<br><br>FOX                             | <i>mecA</i> | <i>sea, seb</i>                          |
| Vatansever <i>et al</i> [103] | <i>S. aureus</i> | Asia   | Turkey/<br>Food<br>handlers                                   | Cross-<br>sectional           | 28    | 10 (35.7)  | C/PCR           | 10 (35.7) / 0 (0.0)     | NT | DD<br><br>FOX, TMP                        | NR          | NT                                       |
| Sepin-Özen <i>et al</i> [104] | <i>S. aureus</i> | Asia   | Turkey/<br>Food-<br>handlers                                  | Retrospe<br>ctive             | 15600 | 526 (3.37) | C               | 526 (3.4) / NT          | NT | NT                                        | NT          | NT                                       |
| Šegalo <i>et al</i> [105]     | <i>S. aureus</i> | Europe | Bosnia<br>and<br>Herzegov<br>ina/Food<br>handlers             | retrospect<br>ive study<br>in | 1139  | 792 (7.1)  | C               | 792 (7.1)/ NT           | NA | NT                                        | NT          | NT                                       |
| Uzunovic <i>et al</i> [106]   | <i>S. aureus</i> | Europe | Bosnia<br>and<br>Herzegov                                     | Cross-<br>sectional           | 13690 | 189 (1.4)  | C               | 189 (1.4) /<br>3 (0.02) | NT | NT                                        | <i>mecA</i> | NT                                       |

|                               |                  |         |                                                             |                 |     |            |           |                      |                                             |                               |             |                                                               |
|-------------------------------|------------------|---------|-------------------------------------------------------------|-----------------|-----|------------|-----------|----------------------|---------------------------------------------|-------------------------------|-------------|---------------------------------------------------------------|
|                               |                  |         | ina/ Food handlers                                          |                 |     |            |           |                      |                                             |                               |             |                                                               |
| Castro <i>et al</i> [13]      | <i>S. aureus</i> | Europe  | Portugal/ Food handlers                                     | Cross-sectional | 162 | 32 (19.8)  | C/ PCR    | 32 (19.8) / 0 (0.0)  | NA                                          | DD                            | NA          | <i>tst, sea, sej, seg, sei, sed, , seh, sec<sub>boy</sub></i> |
| De Jonge <i>et al</i> [107]   | <i>S. aureus</i> | Europe  | Netherlands/ Food handlers                                  | Cross-sectional | 95  | 31 (32.6)  | C/PCR/MT  | 31 (32.6)/0 (0.0)    | NA                                          | FOX<br>DD<br>FOX              | ND          | ND                                                            |
| Sergelidis <i>et al</i> [108] | <i>S. aureus</i> | Europe  | Greece/ Food handlers (Salad)                               | Cross-sectional | 12  | 6 (50.0)   | C         | 6 (50.0) / (0.0)     | NT                                          | DD<br>OXA                     | NT          | NT                                                            |
| Ribeiro and Clerigo, [109]    | <i>S. aureus</i> | Europe  | Portugal/ bakery worker                                     | Cross-sectional | 10  | 4 (40.0)   | C         | 4 (40.0) /1 (25.0)   | NT                                          | NT                            | NT          | NT                                                            |
| Cuny <i>et al</i> [110]       | <i>S. aureus</i> | Europe  | Germany / Butchers, meat sellers, and cooks                 | Cross-sectional | 286 | 130 (45.5) | C/PCR/MT  | 130 (21.5)/ 2 (0.33) | NT                                          | DD<br>FOX                     | <i>mecA</i> | NT                                                            |
| Leibler <i>et al</i> [111]    | <i>S. aureus</i> | America | USA / Healthy Beef-packing workers                          | Cross-sectional | 137 | 37 (27.0)  | C / PCR   | 37 (27.0)/ 5 (3.6)   | NA                                          | DD<br>PEN, FOX, ERY, CLI, CIP | NT          | NA                                                            |
| Acco <i>et al</i> [112]       | <i>S. aureus</i> | America | Brazil/ Food handlers jelly fruit and cereal foods industry | Cross-sectional | 47  | 14 (30)    | C/PCR     | 14 (30.0) / NA       | NT                                          | DD<br>PEN, CIP, ERY, CLI      | NT          | NT                                                            |
| Rall <i>et al</i> [113]       | CoPS and CoNS    | America | Brazil/ Food handlers                                       | Cross-sectional | 62  | 15 (22.1)  | C/PCR     | 15 (22.1)/NR         | S.ep, Sw                                    | NT                            | NT          | NT                                                            |
| Da Silva <i>et al</i> [114]   | CoPS, CoNS       | America | Brazil/ food handlers                                       | Cross-sectional | 60  | 12 (20.0)  | C.PCR     | 12 (20.0)/0 (0.0)    | Sw, Slug, Sep, Shae, Shom, Scoh, Ssim, Scap | DD<br>FOX,                    | ND          | <i>sea seb sec sed see seg seh sei</i>                        |
| Aung <i>et al</i> [115]       | CoPS             | Asia    | Burma/ food handlers                                        | Cross-sectional | 563 | 110 (19.5) | C/ PCR/MT | 110 (19.5)/ 0 (0.0)  | <i>Sarg, 1</i> (0.8%)                       | NT                            | NR          | <i>tsst, lukS/F-PV, sea, sec</i>                              |

<sup>a</sup> Detection method: C/MALDI/PCR/MT: Culture / MALDI-TOF-MS / PCR / Molecular typing

<sup>b</sup> SE: *S. epidermidis*; SHae: *S. haemolyticus*; SSa: *S. saprophyticus*; SL: *S. lugdunensis*; SCa: *S. capitis*; SC: *S. cohinii*; SH: *S. hominis*; SHy: *S. hyicus*; SCs: *S. caseolyticus*; SSi: *S. simulans*; SD: *S. delphini*; SSli: *S. schleiferi* SW: *S. warnieri*; SPas: *S. pasteurii*; Sarg: *S. argenteus*

<sup>c</sup> Technique used: Disk-diffusion method (DD), MIC determination (MIC). Top 4 groups of antimicrobial agents: beta-lactams (BL). Fluoroquinolones (FQ), Macrolides (Mc), Tetracycline (Tet), Vancomycin (Van)

<sup>d</sup> NT: Not tested

NA: Not available (tested but result not published on article)

ND: Not detected

NR: Not reported in detail

PEN: Penicillin; AMX: Amoxicillin; ERY: Erythromycin; CHL: Chloramphenicol; CLI: Clindamycin; STR: Streptomycin; Van: vancomycin; TET: Tetracycline; OXA: Oxacillin; RIF: Rifampicin; FOX: Cefoxitin; LEV: Levofloxacin; CIP: Ciprofloxacin; KAN: Kanamycin; GEN: Gentamycin; MUP: Mupirocin; SXT: Trimethoprim/sulfamethoxazole

**Supplementary Table S3.** Study characteristics, species, antimicrobial resistance, and virulence genes of staphylococcal nasal carriages in veterinary students and practitioners (n= 26)

| Author (s)<br>(reference)               | Staphylococcal species | Continent | Country/Subjects                      | Study design | Sample size     | No. of staphylococcal positive cases (%) | Detection method <sup>a</sup> | Detection of <i>S. aureus</i> (%) / MRSA (%) | <i>Staphylococcus</i> species (non- <i>aureus</i> ) detected (%) <sup>b</sup> | Antimicrobial resistance phenotype technique/ Major resistant types <sup>c</sup> | Antimicrobial Resistance genes                                          | Virulence genes                                                                      |
|-----------------------------------------|------------------------|-----------|---------------------------------------|--------------|-----------------|------------------------------------------|-------------------------------|----------------------------------------------|-------------------------------------------------------------------------------|----------------------------------------------------------------------------------|-------------------------------------------------------------------------|--------------------------------------------------------------------------------------|
| Rasamiravaka <i>et al</i> [116]         | <i>S. aureus</i>       | Africa    | Madagascar /Veterinary students       | 155          | Cross-sectional | 30 (19.4)                                | C                             | 30 (19.4)/ 14 (9.03)                         | NT                                                                            | DD<br><br>PEN, GEN, ERY, TET, VAN, OXA                                           | NT                                                                      | NT                                                                                   |
| Anueyiagu <i>et al</i> [23]             | <i>S. aureus</i>       | Africa    | Nigeria/veterinary students           | 130          | Cross-sectional | 66 (50.8)                                | C                             | 66 (50.8)/ 50 (38.4)                         | NT                                                                            | DD<br><br>OXA, GEN, ERY, CHL, STR, CIP                                           | NT                                                                      | NT                                                                                   |
| Gaddafi <i>et al</i> [117]              | <i>S. aureus</i>       | Africa    | Nigeria/Veterinarians                 | 41           | Prospective     | NR                                       | C/PCR                         | NR/ 10 (24.4)                                | NR                                                                            | DD<br><br>PEN, OXA, ERY, NEO, GEN                                                | <i>mecA</i>                                                             | NT                                                                                   |
| Kuroda <i>et al</i> [118]               | <i>S. aureus</i>       | Asia      | Japan/Veterinarians                   | 53           | Prospective     | NR                                       | C/PCR                         | NR / 16 (30.1)                               | NT                                                                            | DD method<br><br>FOX                                                             | <i>mecA</i>                                                             | NT                                                                                   |
| Zhang <i>et al</i> [119]                | <i>S. aureus</i>       | Asia      | China/Veterinary Staff                | 51           | Cross-sectional | 12 (23.5)                                | C/PCR/MT                      | 12 (23.5) /1 (1.9)                           |                                                                               | DD<br><br>PEN, OXA, CLI, ERY, TET, GEN                                           | <i>nuc, mecA, linA, erm(B), aacA-aphD, tet(K)</i>                       | NT                                                                                   |
| Sekhar <i>et al</i> [120]               | <i>S. aureus</i>       | Asia      | India/Veterinary Students             | 40           | Prospective     | 15 (37.5)                                | C/PCR                         | 15 (37.5)/ 4 (10.0)                          | 10.0, 15.0 and 10.0 in owners pets, veterinary students respectively          | DD<br>FOX, OXA                                                                   | <i>mecA, blaZ</i>                                                       | NT                                                                                   |
| Kittl <i>et al</i> [121]                | <i>S. aureus</i>       | Europe    | Switzerland /Veterinarians            | 212          | Cross-sectional | NR                                       | C/PCR/MT                      | NR/ 14 (6.6)                                 | NT                                                                            | NR                                                                               | <i>mecA, aac(6')-Ie-aph(2'')-Ia, dfrK, tet(M), str, blaZ</i>            | <i>chp, sak, scn, lukED, tst</i>                                                     |
| Huber <i>et al</i> [122]                | <i>S. aureus</i>       | Europe    | Switzerland /Veterinarians            | 133          | Cross-sectional | NR                                       | C/PCR/MT                      | NR/ 4 (3.0)                                  | NT                                                                            | DD<br><br>PEN, OXA, ERY, CLI, GEN                                                | <i>mecA</i>                                                             | ND                                                                                   |
| Wettstein-Rosenkranz <i>et al</i> [123] | <i>S. aureus</i>       | Europe    | Switzerland/Veterinary care providers | 369          | Cross-sectional | NR                                       | C/PCR/MT                      | NR/ 14 (3.4)                                 | NT                                                                            | DD<br><br>PEN, FOX, GEN, TET                                                     | <i>mecA, tet(M) tet(K)], dfrK, dfrG, aac(6')-Ie – aph(2')- Ia, blaZ</i> | <i>hlgA hlgB hlgC sea, sed seg sei sej selm seln selo ser selu sak chp scn lukED</i> |

|                                |                     |           |                                     |     |                 |           |                                            |                    |     |                                                       |             |                       |
|--------------------------------|---------------------|-----------|-------------------------------------|-----|-----------------|-----------|--------------------------------------------|--------------------|-----|-------------------------------------------------------|-------------|-----------------------|
| Wulf <i>et al</i> [124]        | <i>S. aureus</i>    | Europe    | Denmark/ Veterinarians              | 272 | Cross-sectional | NR        | C/PCR/MT                                   | NR/ 34 (12.5)      | NT  | DD<br>FOX, ERY, CLI, TET,<br>GEN, CIP, SXT            | <i>mecA</i> | NT                    |
| Mroczkowska <i>et al</i> [125] | <i>S. aureus</i>    | Europe    | Poland /Veterinarians               | 38  | Prospective     | 8 (21.1)  | C/PCR/MT                                   | 8 (21.1)/ 4 (10.5) | NT  | DD                                                    | <i>mecA</i> | NR                    |
| Post <i>et al</i> [126]        | <i>S. aureus</i>    | Europe    | UK/ veterinary Surgeon's conference | 60  | Cross-sectional | NR        | C/PCR/MT                                   | NR/3 (5.0)         | NT  | FOX<br>DD                                             | <i>mecA</i> | <i>can, fib, sdrD</i> |
| Žemličková <i>et al</i> [127]  | <i>S. aureus</i>    | Europe    | Czech/ Veterinarians                | 280 | Cross-sectional | NR        | C/PCR/MT                                   | NR/ 2 (0.7)        | NT  | FOX, RIF, GEN,<br>TOB, AMK, TET<br>DD<br>FOX          | <i>mecA</i> | ND                    |
| Cuny <i>et al</i> [128]        | <i>S. aureus</i>    | Europe    | Germany/ Pig Veterinarians          | 49  | Cross-sectional | NR        | C/PCR                                      | NR/22 (44.9)       | NT  | DD<br>PEN, OXA, TET,<br>ERY, CLI                      | <i>mecA</i> | NT                    |
| Heller <i>et al</i> [129]      | <i>S. aureus</i>    | Europe    | UK/ University clinic veterinarians | 64  | Cross-sectional | NR        | C/PCR                                      | NR / 2 (3.1)       | NT  | NR                                                    | <i>mecA</i> | NT                    |
| Moodley <i>et al</i> [130]     | <i>S. aureus</i>    | Europe    | Denmark/Veterinary practitioners    | 222 | Cross-sectional | NR        | C/PCR                                      | NR/ 9 (4.1)        | NT  | DD<br><br>OXA, ERY, CLI,<br>CHL, FD, MUP, SXT,<br>TET | <i>mecA</i> | NT                    |
| Sun <i>et al</i> [131]         | <i>S. aureus</i>    | America   | USA/ Swine veterinarians            | 66  | Cross-sectional | 43 (65.2) | C/PCR                                      | 43 (65.2)/6 (9.5)  | NA  | DD<br><br>OXA                                         | <i>mecA</i> | <i>scn, sak</i>       |
| Anderson <i>et al</i> [132]    | <i>S. aureus</i>    | America   | USA/ veterinary personnel           | 257 | Cross-sectional | NR        | C/ PBP2a<br>immunoagglutination<br>/PCR/MT | NR/26 (10.1)       | NT  | NT                                                    | <i>mecA</i> | NT                    |
| Hanselman <i>et al</i> [133]   | <i>S. aureus</i>    | America   | Canada/Veterinary personnel         | 417 | Cross-sectional | NR        | C/PCR/PB<br>P2a/MT                         | NR/27 (6.5)        | NT  | DD<br><br>FOX, ERY, CIP, TET,<br>GEN, SXT             | <i>mecA</i> | ND                    |
| Worthing <i>et al</i> [134]    | <i>S. aureus</i>    | Australia | Australia/Veterinary personnel      | 46  | Cross-sectional | NR        | C/PCR/<br>MT                               | NR/4 (8.7)         | NT  | NT                                                    | <i>mecA</i> | NT                    |
| Neradova <i>et al</i> [135]    | CoPS<br>and<br>CoNS | Europe    | Czech Republic/Veterinary personnel | 134 | Cross-sectional | 40 (29.9) | C/PCR/MT                                   | 40 (29.9)/ 9 (6.7) | SPs | DD<br><br>FOX, CXT, TET,<br>GEN, CIP                  | <i>mecA</i> | NT                    |

|                               |               |         |                                    |     |                 |           |                 |              |                                                      |                                     |                                                                      |    |
|-------------------------------|---------------|---------|------------------------------------|-----|-----------------|-----------|-----------------|--------------|------------------------------------------------------|-------------------------------------|----------------------------------------------------------------------|----|
| Paterson <i>et al</i> [136].  | CoPS and CoNS | Europe  | UK/Cattle veterinary practitioners | 307 | Cross-sectional | NR        | C/PCR/MT        | NR/ 8 (2.6)  | SHae                                                 | MIC<br>OXA, FOX, ERY, CLI, TET, SXT | <i>yrA tet(M) tet(L), aacA, aphD, dfrK erm(C), erm(T), mecA mecA</i> | NT |
| Burstiner <i>et al</i> [137]  | CoPS and CoNS | America | USA/Academic veterinary staff      | 341 | Cross-sectional | NR        | C/PCR/MT        | NR/59 (17.3) | NT                                                   | DD<br>FOX                           | <i>mecA mecA</i>                                                     | NT |
| Paul <i>et al</i> [138]       | CoPS          | Europe  | Denmark/ small animal veterinarian | 128 | Prospective     | NR        | C/PCR           | NR/ 2 (1.6)  | MRSP, 5 (3.9)                                        | DD<br>FOX                           | <i>mecA</i>                                                          | NT |
| Boost <i>et al</i> [139]      | CoPS          | Asia    | Hong Kong/Veterinary personnel     | 150 | Cross-sectional | NR        | C/PCR/MT        | NR/ 1 (0.7)  | SPs                                                  | NT                                  | <i>mecA</i>                                                          | NT |
| Malissiova <i>et al</i> [140] | CoNS          | Europe  | Greece/Healthy veterinary students | 81  | Prospective     | 22 (27.2) | C / PCR / MALDI | ND           | SHae(54), SW(45.8), SE (16.6), SPas (4.2) SCa (4.2). | DD<br>FOX                           | <i>mecA (S. epidermidis)</i>                                         | NT |

<sup>a</sup> Detection method: C/MALDI/PCR/MT: Culture / MALDI-TOF-MS / PCR / Molecular typing; STE: *Staphylococcal* Enterotoxins

<sup>b</sup> SE: *S. epidermidis*; SHae: *S. haemolyticus*; SSa: *S. saprophyticus*; SL: *S. lugdunensis*; SCa: *S. capitis*; SC: *S. cohinii*; SH: *S. hominis*; SHy: *S. hyicus*; SCs: *S. caseolyticus*; SSi: *S. simians*; SD: *S. delphini*; SSli: *S. schleiferi* SW: *S. warnieri*; SPas: *S. pasteurii*.

<sup>c</sup> Technique used: Disk-diffusion method (DD-method), MIC determination (MIC). Top 4 groups of antimicrobial agents: beta-lactams (BL). Fluoroquinolones (FQ), Macrolides (Mc), Tetracycline (Tet), Vancomycin (Van)

<sup>d</sup> NT: Not tested

NA: Not available (tested but result not published on article)

ND: Not detected

NR: Not reported in detail

PEN: Penicillin; AMX: Amoxicillin; ERY: Erythromycin; CHL: Chloramphenicol; CLI: Clindamycin; STR: Streptomycin; Van: vancomycin; TET: Tetracycline; OXA: Oxacillin; RIF: Rifampicin; FOX: Cefoxitin; LEV: Levofloxacin; CIP: Ciprofloxacin;; KAN: Kanamycin; GEN: Gentamycin; MUP: Mupirocin; SXT: Trimethoprim/sulfamethoxazole

**Supplementary Table S4.** Study characteristics, species, antimicrobial resistance pattern, and virulence genes detected in staphylococcal nasal isolates recovered from healthy livestock farmers (n = 51).

| Author (s)<br>(reference)          | Staphylococcal<br>species | Continent | Country/Subjects                                           | Sample size                                                    | Study<br>design                    | No. of<br>staphylococcal<br>positive cases<br>(%) | Detection method<br>C/MALDI/PCR/MT <sup>a</sup> | Detection<br>of <i>S.<br/>aureus</i><br>(%)/<br>MRSA<br>(%) | <i>Staphylococcus</i><br><i>species</i><br>(non-<br><i>aureus</i> )<br>detected<br>(%) <sup>b</sup> | Antimicrobial<br>resistance<br>phenotype<br>technique <sup>c</sup> / Major<br>resistant types | Antimicrobial<br>resistance genes | Virulence<br>genes |
|------------------------------------|---------------------------|-----------|------------------------------------------------------------|----------------------------------------------------------------|------------------------------------|---------------------------------------------------|-------------------------------------------------|-------------------------------------------------------------|-----------------------------------------------------------------------------------------------------|-----------------------------------------------------------------------------------------------|-----------------------------------|--------------------|
| Rasamiravaka<br><i>et al</i> [141] | <i>S. aureus</i>          | Africa    | Madagascar/<br>poultry non-<br>industrial farmers          | 170                                                            | Cross-<br>sectional                | 69 (38.3)                                         | C/PCR                                           | 69 (38.3)/<br>45 (26.4)                                     | NT                                                                                                  | DD<br><br>PEN, FOX, TET,<br>OFX, COT, OXA,<br>ERY                                             | NT                                | NT                 |
| Mourabit <i>et al</i><br>[142]     | <i>S. aureus</i>          | Africa    | Morocco/<br>livestock breeders                             | 50                                                             | Cross-<br>sectional                | 30 (60.0)                                         | C/PCR                                           | 30 (60.0)/<br>0 (0.0)                                       | NT                                                                                                  | DD<br><br>FOX, TET, ERY,<br>KAN                                                               | ND                                | <i>tst-1</i>       |
| Elemo <i>et al</i><br>[143]        | <i>S. aureus</i>          | Africa    | Ethiopia/ dairy<br>workers                                 | 98                                                             | Cross-<br>sectional                | 38 (39.6)                                         | C                                               | 38 (39.6)/<br>23 (23.5)                                     | NT                                                                                                  | DD<br><br>PEN, AMP, FOX,<br>OXA, TET, SXT                                                     | NT                                | NT                 |
| Adesida <i>et al</i><br>[144]      | <i>S. aureus</i>          | Africa    | Nigeria/ farm<br>personnel (cow,<br>sheep, goats, pigs)    | 50                                                             | Prospective                        | 28 (56.0)                                         | C/PCR                                           | 28 (56.0)/<br>3 (6.0)                                       | NT                                                                                                  | DD<br><br>OXA, FOX, SXT,<br>ERY, GEN                                                          | <i>mecA</i>                       | NT                 |
| Okorie-Kanu<br><i>et al</i> [145]  | <i>S. aureus</i>          | Africa    | Nigeria/ chicken<br>and pig<br>slaughterhouses<br>workers. | 45 each from<br>chicken and pig<br>slaughterhouses<br>workers. | Comparative<br>cross-<br>sectional | 5 (11.1) versus<br>3 (6.7)                        | C/PCR/MT                                        | 5 (11.1)/<br>0 (0.0)<br>versus 3<br>(6.7)/0<br>(0.0)        | NT                                                                                                  | DD<br><br>PEN, OXA, ERY,<br>CLI, TET, SXT                                                     | ND                                | <i>lukS/F-PV</i>   |
| Odetokun <i>et al</i><br>[146]     | <i>S. aureus</i>          | Africa    | Nigeria/ Pig<br>workers                                    | 260                                                            | Cross-<br>sectional                | 35 (13.5)                                         | C/PCR/MT                                        | 35<br>(13.5)/8<br>(3.1)                                     |                                                                                                     | NT                                                                                            | <i>mecA</i>                       | NT                 |
| Otalú <i>et al</i><br>[147]        | <i>S. aureus</i>          | Africa    | Nigeria/ pig<br>farmers                                    | Cross-sectional                                                | 55                                 | C/PCR/MT                                          | NR                                              | NR/6<br>(10.1)                                              | NT                                                                                                  | DD<br>PEN, FOX                                                                                | <i>mecA</i>                       | <i>scn</i>         |
| Kalayu <i>et al</i><br>[148]       | <i>S. aureus</i>          | Africa    | Ethiopia/ Diary<br>farmers                                 | Cross-sectional                                                | 71                                 | C/PCR                                             | 22 (31.0)                                       | 22 (31.0)/<br>1 (1.4)                                       | NT                                                                                                  | DD<br><br>FOX, CLI, ERY,<br>PEN, TET, SXT                                                     | <i>mecA</i>                       | NT                 |
| Gaddafi <i>et al</i><br>[149]      | <i>S. aureus</i>          | Africa    | Nigeria/ pig farm<br>attendants                            | 12                                                             | Cross-<br>sectional                | NR                                                | C/PCR                                           | NR/3<br>(25.0)                                              | NT                                                                                                  | DD<br><br>OXA, ERY, NEO,<br>SUL, GEN                                                          | <i>mecA</i>                       | NT                 |

|                                 |                  |      |                                                      |                                                   |                 |           |          |                            |    |                                                   |                                     |                                |
|---------------------------------|------------------|------|------------------------------------------------------|---------------------------------------------------|-----------------|-----------|----------|----------------------------|----|---------------------------------------------------|-------------------------------------|--------------------------------|
| Rongsanam <i>et al</i> [150]    | <i>S. aureus</i> | Asia | Thailand/ swine production workers                   | 202                                               | Cross-sectional | NR        | C/PCR    | NR/16 (7.9)                | NT | DD<br>PEN, FOX, TET, CIP, CLI, SXT, GEN           | <i>mecA</i>                         | NT                             |
| Assafi <i>et al</i> [151]       | <i>S. aureus</i> | Asia | Iraq/ broilers farm workers                          | 75                                                | Cross-sectional | 63 (84.0) | C/PCR    | 63 (84.0)/18 (13.3)        | NT | DD<br>OXA, VAN, CIP, CHL, AMK                     | <i>mecA</i>                         | NT                             |
| Moon <i>et al</i> [152]         | <i>S. aureus</i> | Asia | Korea/ Pig farmers                                   | 126                                               | Cross-sectional | NR        | C/PCR/MT | NR/21 (16.7)               | NT | DD<br>FOX                                         | <i>mecA</i>                         | NT                             |
| Garipcin and Seker [153]        | <i>S. aureus</i> | Asia | Turkey/ cattle farm workers                          | 150                                               | Cross-sectional | 44 (29.3) | C/PCR    | 44 (29.3)/13 (8.7)         | NT | DD<br>OXA, GEN, CIP, RIF, NEO, TET                | <i>mecA</i>                         | NT                             |
| Cui <i>et al</i> [154]          | <i>S. aureus</i> | Asia | China/ Pig workers                                   | 120                                               | Cross-sectional | NR        | C/PCR/MT | NR/ 2 (1.7)                | NT | MIC<br>FOX, CIP, TET, GEN, CLI, ERY               | <i>mecA</i>                         | NT                             |
| Fan <i>et al</i> [155]          | <i>S. aureus</i> | Asia | China/ livestock workers                             | 1162                                              | Cross-sectional | 108 (9.3) | C/PCR/MT | 108 (9.3)/ 16 (1.4)        | NT | DD<br>FOX, ERY, CLI, TET, RIF, CHL, CIP, LZD      | <i>mecA</i>                         | <i>chp, scn, sea, sak, sep</i> |
| Ye <i>et al</i> [156]           | <i>S. aureus</i> | Asia | China/ Pig workers                                   | 244                                               | Cross-sectional | 37(15.2)  | C/PCR/MT | 37(15.2)/ 26 (10.7)        | NT | DD<br>FOX, CLI, TET, ERY, CHL, CIP                | <i>mecA</i>                         | <i>scn, sea, sak, chp</i>      |
| Fang <i>et al</i> [157]         | <i>S. aureus</i> | Asia | Taiwan/ pig farm workers                             | 100                                               | Cross-sectional | NR        | C/PCR/MT | NR/13 (13.0)               | NT | DD<br>PEN, DOX, FOX, CIP, ERY, CLI, SXT           | <i>mecA</i>                         | <i>lukS/F-PV</i>               |
| Lim <i>et al</i> [158]          | <i>S. aureus</i> | Asia | Korea/ Diary farm workers                            | 43                                                | Cross-sectional | NR        | C.PCR    | NR/1 (2.3)                 | NT | DD<br>FOX                                         | <i>mecA</i>                         | NT                             |
| Back <i>et al</i> [159]         | <i>S. aureus</i> | Asia | Korea/ pig farm workers                              | 186                                               | Prospective     | NR        | C/PCR/MT | NR/ 6 (3.2)                | NT | DD<br>AMP, FOX, CHL, CLI, ERY, CEF, GEN, TET, CIP | <i>mecA, tet(M), tet(K), tet(L)</i> | <i>sed</i>                     |
| Jayaweera and Kumbukgolla [160] | <i>S. aureus</i> | Asia | Sri Lanka/ livestock farmers (Pigs, cattle, poultry) | 94 (31 in piggery, 32 in poultry and 31 in diary) | Cross-sectional | NR        | C/PCR    | NR/ 15 (15.9)<br>8 in Pig, | NT | DD<br>OXA, ERY, CLI, TET, GEN                     | <i>mecA</i>                         | NT                             |

|                                 |                  |        |                                         |                                                   |                 |           |                |                                                  |    |                                             |                                                                                                                                      |                                                                                                                    |
|---------------------------------|------------------|--------|-----------------------------------------|---------------------------------------------------|-----------------|-----------|----------------|--------------------------------------------------|----|---------------------------------------------|--------------------------------------------------------------------------------------------------------------------------------------|--------------------------------------------------------------------------------------------------------------------|
| Normanno <i>et al</i> [161]     | <i>S. aureus</i> | Europe | Italy/ pigs and abattoir workers        | 113                                               | Cross-sectional | NR        | C/PCR/MT       | 4 in Poultry, 3 in cattle farmers<br>NR/ 9 (7.9) | NT | DD<br>FOX, CLI, ERY, KAN, TET               | <i>mecA</i>                                                                                                                          | ND                                                                                                                 |
| Aubry-Damon <i>et al</i> [162]  | <i>S. aureus</i> | Europe | France / African pig farmers            | 112                                               | Cross-sectional | 50 (44.6) | C              | 50 (44.6)/ 5 (4.5)                               | NT | DD<br>OXA, PEF, GEN                         | NT                                                                                                                                   | NT                                                                                                                 |
| Etter <i>et al</i> [163]        | <i>S. aureus</i> | Europe | Switzerland / famers                    | 160 (87 pupils and 73 members of farmer families) | Cross-sectional | 73 (45.6) | C/MALDI/PCR/MT | 73 (45.6)/2 (1.25)                               | NT | NR                                          | <i>mph</i> (C), <i>aphA3</i> , <i>fosB</i> , <i>mecA</i> , <i>blaZ</i> , <i>InuA</i> , <i>aadD</i> , <i>tet</i> (K), <i>fosB</i>     | <i>tst</i> , <i>sea</i> , <i>sab</i> , <i>sec</i> , <i>sel</i> , <i>sec</i> , <i>seg</i> , <i>sel</i> , <i>egc</i> |
| Kittl <i>et al</i> [121]        | <i>S. aureus</i> | Europe | Switzerland / animal farmers (pigs)     | 156                                               | Cross-sectional | NR        | C/PCR/MT       | NR / 8 (5.1)                                     | NT | NT                                          | <i>mecA</i> , <i>dfrG</i> , <i>erm</i> (A), <i>erm</i> (C), <i>spc</i> , <i>tet</i> (K), <i>tet</i> (M), <i>vga</i> (E), <i>blaZ</i> | <i>scn</i> , <i>chp</i> , <i>sak</i> , <i>tsst</i>                                                                 |
| VAN CLEEF <i>et al</i> [164]    | <i>S. aureus</i> | Europe | Netherlands/ pig slaughterhouse workers | Cross-sectional                                   | 249             | C/PCR     | NR             | NR/14 (5.6)                                      | NT | DD<br>TET, ERY, CLI, SXT, GEN, TOB          | <i>mecA</i>                                                                                                                          | NT                                                                                                                 |
| Cuny <i>et al</i> [128]         | <i>S. aureus</i> | Europe | Germany/ Pig farmers                    | 113                                               | Cross-sectional | NR        | C/PCR          | NR/97 (85.8)                                     | NT | DD<br>PEN, OXA, TET, ERY, CLI               | <i>mecA</i>                                                                                                                          | NT                                                                                                                 |
| Van cleef <i>et al</i> [165]    | <i>S. aureus</i> | Europe | Netherlands/ pig farmers                | Cross-sectional                                   | 120             | C/PCR     | NR             | NR/ 53 (44.2)                                    |    | DD<br>FOX                                   | <i>mecA</i>                                                                                                                          | NT                                                                                                                 |
| Papadopoulos <i>et al</i> [166] | <i>S. aureus</i> | Europe | Greece/ Diary workers                   | Cross-sectional                                   | 26              | C/PCR/MT  | 10 (38.5)      | 10 (38.5) /2 (7.7)                               | NT | DD<br>OXA, PEN, GEN, KAN, VAN               | <i>mecA</i>                                                                                                                          | Sea, sec                                                                                                           |
| Parisi <i>et al</i> [167]       | <i>S. aureus</i> | Europe | Italy/ Pig farm workers                 | Cross-sectional                                   | 150             | C/PCR/MT  | NR             | NR/26 (17.3)                                     | NT | DD<br>AK, AMP, CTX, CHL, ERY, SXT, TET, FOX | <i>mecA</i>                                                                                                                          | NT                                                                                                                 |
| Sakwinska <i>et al</i> [168]    | <i>S. aureus</i> | Europe | Switzerland/ livestock workers          | Cross-sectional                                   | 158             | C/PCR/MT  | 57 (36)        | 57 (36)/ 2 (1.3)                                 | NT | NT                                          | <i>mecA</i>                                                                                                                          | NT                                                                                                                 |
| Antoci <i>et al</i> [169]       | <i>S. aureus</i> | Europe | Italy/ Diary farmers                    | Cross-sectional                                   | 113             | C/PCR/MT  | NR             | NR/ 40 (36.0)                                    | NT | DD<br>OXA, FOX                              | <i>mecA</i>                                                                                                                          | ND                                                                                                                 |

|                                |                  |        |                                    |     |                 |            |                                      |                      |    |                                    |                                                           |             |
|--------------------------------|------------------|--------|------------------------------------|-----|-----------------|------------|--------------------------------------|----------------------|----|------------------------------------|-----------------------------------------------------------|-------------|
| van Cleef <i>et al</i> [170]   | <i>S. aureus</i> | Europe | Denmark/ pig farm workers          | 16  | Cross-sectional | 16 (100.0) | C/PCR/MT                             | 16 (100.0)/2 (12.5)  | NT | NR                                 | <i>mecA</i>                                               | NT          |
| Fischer <i>et al</i> [171]     | <i>S. aureus</i> | Europe | Germany/ pig farmers               | 85  | Cross-sectional | NR         | C/PCR/MT                             | NR/ 72 (84.7)        | NT | DD<br>FOX                          | NT                                                        | NT          |
| Bunke <i>et al</i> [172]       | <i>S. aureus</i> | Europe | Germany/ Pig farmers               | 86  | Cross-sectional | 54 (62.8)  | C/PCR                                | 54 (62.8)/ 18 (20.9) | NT | DD<br>FOX                          | <i>mecA</i>                                               | NT          |
| Schnitt <i>et al</i> [173]     | <i>S. aureus</i> | Europe | Germany/Cattle worker              | 14  | Prospective     | NT         | C/ PCR/MT                            | NR/6 (42.9)          | NT | DD<br>FOX                          | <i>mecA</i>                                               | NT          |
| Dahms <i>et al</i> [174]       | <i>S. aureus</i> | Europe | Germany/ pig farmers               | 78  | Cross-sectional | NR         | C/PCR/MT                             | NR/ 20 (25.6)        | NT | DD<br>OXA, TET, ERY<br>CLI, CIP    | <i>mecA</i>                                               | ND          |
| Kock <i>et al</i> [175]        | <i>S. aureus</i> | Europe | Germany/ pig farmers               | 35  | Prospective     | NR         | C/PCR/MT                             | NR/27 (77.1)         | NT | DD<br>FOX                          | <i>mecA, blaZ, tet(M), tet(K), erm(A), erm(B), erm(C)</i> | NT          |
| Bisdorff <i>et al</i> [176]    | <i>S. aureus</i> | Europe | Germany/ Livestock workers         | 190 | Cross-sectional | NR         | C/PCR/MT                             | NR/46 (24.2)         | NT | DD<br>FOX                          | NT                                                        | NT          |
| Giovanni <i>et al</i> [177]    | <i>S. aureus</i> | Europe | Italy/ buffalo milk tank operators | 24  | Cross-sectional | NR         | C/PCR/MT                             | NR/1 (4.00)          | NT | MIC<br>OXA, FOX                    | <i>mecA</i>                                               | <i>icaA</i> |
| Pirollo <i>et al</i> [178]     | <i>S. aureus</i> | Europe | Italy/ pig farmers                 | 88  | Cross-sectional | 49 (55.7)  | C/PCR/MT                             | 49 (55.7)/ 19 (21.6) | NT | DD<br>PEN, FOX, SXT, GEN, TET, ERY | <i>mecA</i>                                               | NT          |
| Mascaro <i>et al</i> [179]     | <i>S. aureus</i> | Europe | Italy/ sheep farmers               | 275 | Cross-sectional | 97 (35.5)  | C/ PCR/MT                            | 97 (35.5)/3 (1.1)    | NT | DD<br>OXA, FOX, TET, ERY, CLI, LZD | <i>mecA</i>                                               | NT          |
| Graveland <i>et al</i> [180]   | <i>S. aureus</i> | Europe | Netherlands/ veal Calf Farmers     | 97  | Cross-sectional | NR         | C/PCR/MT                             | NR/32 (33.0)         | NT | NT                                 | <i>mecA</i>                                               | NT          |
| Mroczkowska <i>et al</i> [125] | <i>S. aureus</i> | Europe | Poland /pig farmers                | 283 | Cross-sectional | 50 (17.7)  | C/PCR/MT                             | 50 (17.7)/ 9 (3.2)   | NT | DD<br>FOX                          | <i>mecA</i>                                               | NR          |
| Reynaga <i>et al</i> [181]     | <i>S. aureus</i> | Europe | Spain/ pig farm workers            | 140 | Cross-sectional | NR         | C/ PBP2a Immunoagglutination/ PCR/MT | NR/ 81 (57.9)        | NT | DD                                 | <i>mecA</i>                                               | NT          |

|                                |                  |           |                                                                                            |                                       |                             |                            |                                    |                                              |                                                                                                                                                    |                                             |    |             |            |
|--------------------------------|------------------|-----------|--------------------------------------------------------------------------------------------|---------------------------------------|-----------------------------|----------------------------|------------------------------------|----------------------------------------------|----------------------------------------------------------------------------------------------------------------------------------------------------|---------------------------------------------|----|-------------|------------|
| Neyra <i>et al</i> [182]       | <i>S. aureus</i> | America   | USA/ hog plant workers                                                                     | 162                                   | Cross-sectional             | 35 (21.6)                  | C/PCR/MT                           | 35 (21.6) / 9 (5.6)                          | NT                                                                                                                                                 | OXA, FOX, TET, ERY, CLI, CIP, GEN, TOB, SXT | DD | <i>mecA</i> | NT         |
| Hatcher <i>et al</i> [183]     | <i>S. aureus</i> | America   | USA/ hog Operation Workers                                                                 | 198                                   | Cross-sectional             | 105 (53.0)                 | C/PCR/MT                           | 105 (53.0)/32 (16.6)                         | NT                                                                                                                                                 | FOX, ERY, CIP, CLI, TET                     | DD | <i>mecA</i> | <i>scn</i> |
| Rinsky <i>et al</i> [184]      | <i>S. aureus</i> | America   | USA/ industrial livestock operation and antibiotic-free livestock operation workers (pigs) | 99 versus 105                         | Comparative cross-sectional | 41 (41.0) versus 42 (40.0) | C/PCR/MT                           | 41 (41.0)/ 3 (3.0) versus 42 (40.0)/ 3 (2.9) | NT                                                                                                                                                 | PEN, OXA, ERY, TET, AMP, CLI                | DD | <i>mecA</i> | <i>scn</i> |
| Smith <i>et al</i> [185]       | <i>S. aureus</i> | America   | USA/ pig farm workers                                                                      | 148                                   | Cross-sectional             | NR                         | C/PBP2a Immunoagglutination PCR/MT | NR/31 (20.9)                                 | NT                                                                                                                                                 | DD                                          |    | NT          | NT         |
| Khanna <i>et al</i> [186]      | <i>S. aureus</i> | America   | Canada/ Pig farmers                                                                        | 25                                    | Prospective                 | NR                         | C/PBP2a Immunoagglutination/ /MT   | NR / 5 (20.0)                                | NT                                                                                                                                                 | FOX                                         | NT | NT          | NT         |
| Sahibzada <i>et al</i> [187]   | <i>S. aureus</i> | Australia | Australia/ Pig farmers                                                                     | 52                                    |                             | NR                         | C/PCR                              | NR/ 31 (59.6)                                | NT                                                                                                                                                 | NT                                          |    | <i>mecA</i> | NT         |
| Sinlapasorn <i>et al</i> [188] | CoPS and CoNS    | Asia      | Thailand/ Pig farmers                                                                      | 98                                    | Cross-sectional             | 3 (3.1)                    | C/PCR/MT                           | 3 (3.1) / 3 (3.1)                            | <i>S</i> Sci, <i>Shae</i> , <i>Sart</i> , <i>S. cohnii subspecies urealyticus</i> , <i>S. hominis subspecies hominis</i> , <i>SChr</i> , <i>SE</i> | MIC                                         |    | <i>mecA</i> | NT         |
| Founou <i>et al</i> [189]      | CoNS             | Africa    | Cameroon and South Africa/ Pig workers                                                     | 53 in Cameroon and 24 in South Africa | Comparative prospective     | ND                         | C/PCR                              | ND/ND                                        | 50 (94,3) and 7 (29.2) MRS in Cameroon and South Africa                                                                                            | OXA, FOX, GEN, ERY, TET                     | DD | <i>mecA</i> | NT         |
|                                |                  |           |                                                                                            |                                       |                             |                            |                                    |                                              |                                                                                                                                                    | PEN, OXA, FOX, TET, SXT                     |    |             |            |

|                               |                  |         |                               |    |                     |          |          |                    |                                                                |    |             |    |
|-------------------------------|------------------|---------|-------------------------------|----|---------------------|----------|----------|--------------------|----------------------------------------------------------------|----|-------------|----|
|                               |                  |         |                               |    |                     |          |          |                    | receptivel<br>y.                                               |    |             |    |
| Argudin <i>et al</i><br>[190] | CoNS             | Europe  | Belgium/ farmers              | 86 | Cross-<br>sectional | NR       | C/PCR/MT | NR                 | SE, Shae,<br>SL, SHom<br>Sep, 64<br>(75)<br>MRSE, 44<br>(51.1) | DD | <i>mecA</i> | NT |
| Roberts <i>et al</i><br>[191] | CoPS and<br>CoNS | America | USA/ healthy<br>dairy farmers | 24 | Cross-<br>sectional | 5 (20.8) | C/PCR    | 5<br>(20.8)/N<br>R | Sep, Shae,<br>Shom,<br>Ssci, Sxy                               | NT | NT          | NT |

<sup>a</sup> Detection method: C/MALDI/PCR/MT: Culture / MALDI-TOF-MS / PCR / Molecular typing

<sup>b</sup> SE: *S. epidermidis*; SHae: *S. haemolyticus*; SSa: *S. saprophyticus*; SL: *S. lugdunensis*; SCa: *S. capitis*; SC: *S. cohini*; SH: *S. hominis*; SHy: *S. hyicus*; SSI: *S. simulans*; SD: *S. delphini*; SSli: *S. schleiferi* SW: *S. warneri*; SPas: *S. pasteurii*; Schr: *S. chromogenes*; Sart: *S. arlettae*

<sup>c</sup>Technique used: Disk-diffusion method (DD), MIC determination (MIC). Top 4 groups of antimicrobial agents: beta-lactams (BL). Fluoroquinolones (FQ), Macrolides (Mc), Tetracycline (Tet), Vancomycin (Van)

<sup>d</sup>NT: Not tested

NA: Not available (tested but result not published on article)

ND: Not detected

NR: Not reported in detail

PEN: Penicillin; AMX: Amoxicillin; ERY: Erythromycin; CHL: Chloramphenicol; CLI: Clindamycin; STR: Streptomycin; Van: vancomycin; TET: Tetracycline; OXA: Oxacillin; RIF: Rifampicin; FOX: Cefoxitin; LEV: Levofloxacin; CIP: Ciprofloxacin;; KAN: Kanamycin; GEN: Gentamycin; AMK: Amikacin; NEO: Neomycin; MUP: Mupirocin; SXT: Trimethoprim/sulfamethoxazole; LZD: Linezolid

**Supplementary Table S5.** Prevalence pattern and genetic profile of PVL-positive *S. aureus* isolates in the nasal cavity of healthy people of the Groups A-D.

| Author (s)<br>(Reference)     | Country/<br>Subjects               | Sample size/ No. <i>S. aureus</i> /<br>No. MRSA | Frequency and<br>Prevalence (%) of<br>PVL in all <i>S. aureus</i> | Frequency and<br>Prevalence (%)<br>of PVL in<br>MSSA | Frequency and<br>Prevalence of<br>PVL (%) in<br>MRSA | Genetic lineages ( <i>spa</i> , CC<br>or ST) (n) in PVL-MRSA | Genetic lineages ( <i>spa</i> , CC or ST) (n) in PVL MSSA                                                                                                                                                                                                                                                                                                                                           |
|-------------------------------|------------------------------------|-------------------------------------------------|-------------------------------------------------------------------|------------------------------------------------------|------------------------------------------------------|--------------------------------------------------------------|-----------------------------------------------------------------------------------------------------------------------------------------------------------------------------------------------------------------------------------------------------------------------------------------------------------------------------------------------------------------------------------------------------|
| Eibach <i>et al</i><br>[33]   | Ghana/Health<br>y children         | 544/ 120/ (22.1)/ 2 (0.37)                      | 69 (57.5)                                                         | 69 (58.5)                                            | 0 (0.0)                                              | ND                                                           | a. CC152/ t1096 (3), t355 (25), t1123 (2), t1172 (1), t1299 (4), t5047 (1)<br>b. CC1/ t127 (3), t591 (1)<br>c. CC121/ t311 (9), t314 (7), t645 (1), t1114 (2)<br>d. CC15/ t84 (18), t085 (1), t346 (1), t385 (1)<br>e. CC30/ t318 (1), t363 (3), t2147 (1)<br>f. CC8/ t451 (1)<br>g. CC88/ t186 (1), t4104 (2)                                                                                      |
| Egyi <i>et al</i><br>[34]     | Ghana/<br>Healthy<br>people        | 234/ 49 (21.0)/ 2 (0.3)                         | 34 (69.4)                                                         | 34 (72.3)                                            | 0 (0.0)                                              | ND                                                           | a. CC5/ t10839(1), t311(3), t071(1)<br>b. CC15/ t7568(1), t084(9), t346(1), t10843(1), t10845(1)<br>c. CC30/ t021(2), t363(1)<br>d. CC97/ t359(1)<br>e. CC45/ t2771(3), t5602(3), t6038(2), t1996(1) t065(1), t10834(1), t10840(1), t10841(1), t1510(1) t3986(1), t861(2), t939(1), t2784(1) t8453(1)<br>f. CC121/ t091(2), t4499(1), t645(1)<br>g. CC152/ t454 (1), t355(12)<br>h. CC707/ t1458(1) |
| Gong <i>et al</i><br>[48]     | China/<br>Healthy<br>children      | 314/ 16 (5.10) / 3 (0.95)                       | 10 (62.5)                                                         | 10 (76.9)                                            | 0 (0.0)                                              | NT                                                           | NT                                                                                                                                                                                                                                                                                                                                                                                                  |
| Mourabit <i>et al</i><br>[36] | Morocco /<br>healthy<br>volunteers | 465/ 178 (38.3)/ 21 (4.5)                       | 22 (12.3)                                                         | 22 (14.1)                                            | 0 (0.0)                                              | ND                                                           | NR                                                                                                                                                                                                                                                                                                                                                                                                  |
| Yan <i>et al</i> [49]         | China/Health<br>y adults           | 2448/ 403 (16.3)/8 (0.33)                       | 9 (2.2)                                                           | 9 (2.3)                                              | 0 (0.0)                                              | ND                                                           | a. CC5/t002 (2)<br>b. CC398 / t011 (1)<br>c. CC7/ t091 (1)<br>d. CC88/ t1376 (1)<br>e. CC6/ t701 (1)<br>f. CC5/ t167 (1)<br>g. CC121/ t645 (1)<br>h. CC22/ t7611 (1)                                                                                                                                                                                                                                |

|                                  |                                                   |                                                   |           |           |           |                         |                                                                          |
|----------------------------------|---------------------------------------------------|---------------------------------------------------|-----------|-----------|-----------|-------------------------|--------------------------------------------------------------------------|
| Karapsias <i>et al</i> [59]      | Greece/ Healthy Air force staff                   | 959/ NR/ 9 (0.94)                                 | NR        | NR        | 1 (11.1)  | ST80/t044 (1)           | NR                                                                       |
| Kirklauskienė <i>et al</i> [60]  | Denmark/Healthy persons                           | 537/ 273 (50.8)/ 0 (0.00)                         | 8 (2.9)   | 8 (2.9)   | ND        | ND                      | NT                                                                       |
| Gorwitz <i>et al</i> [71]        | USA/Healthy people                                | 9004/ 2575 (28.6) /135 (1.5)                      | NR        | NR        | 20 (14.8) | NT                      | NT                                                                       |
| Velasco <i>et al</i> [69]        | USA/ Healthy people                               | 550/ 42 (7.6)/ 0 (0.0)                            | 0 (0.0)   | 0 (0.0)   | 0 (0.0)   | ND                      | ND                                                                       |
| Wardyn <i>et al</i> [73]         | USA/Healthy rural community                       | 131/ 31 (23.7)/ 0 (0.0)                           | 9 (29.0)  | 9 (29.0)  | 0 (0.0)   | ND                      | t021 (3), t2104 (2), t4106 (1), t4032 (1), t015 (1), t3274 (1), t279 (2) |
| Wardyn <i>et al</i> [72]         | USA/Healthy community members                     | 1342/ 156 (22.5)/ 19 (2.7)                        | 5 (3.2)   | NR        | NR        | NR                      | NR                                                                       |
| Hanselman <i>et al</i> [78]      | Canada/Healthy school teachers                    | 220/ 79 /7 (3.2)                                  | 1 (14.2)  | ND        | 1 (14.2)  | NT                      | NT                                                                       |
| Gardella <i>et al</i> [79]       | Argentina/Healthy children                        | 316/98 (31.0)/ 14 (4.4)                           | NR        | 0 (0.0)   | 4 (28.6)  | ST5/t311 (3), t2121 (1) | NR                                                                       |
| Aung <i>et al</i> [115]          | Burma/ food handlers                              | 563 / 110 (19.5)/ 0 (0.0)                         | 15 (13.6) | 15 (13.6) | 0 (0.0)   | ND                      | CC96 (10), CC1 (2), CC8 (1), CC88 (1), CC2250 (1)                        |
| Okorie-Kanu <i>et al</i> [145]   | Nigeria/ chicken and pig slaughterhouses workers. | 45 each/ 5 (11.1)/ 0 (0.0) versus 3 (6.7)/0 (0.0) | 3 (37.5)  | 3 (37.5)  | 0 (0.0)   | ND                      | CC5/ t311 (1), t279 (1)<br>CC-ND/t18346 (1)                              |
| Fang <i>et al</i> [157]          | Taiwan/ pig farm workers                          | 100/ NR/13 (13.0)                                 | NR        | NR        | 1 (7.7)   | ST59/t3527              | NR                                                                       |
| Becker <i>et al</i> [63]         | Germany/ Healthy population                       | 1878/920 (40.9)/131 (0.7)                         | 2 (0.22)  | 2 (0.25)  | 0 (0.0)   | ND                      | t216 and t004                                                            |
| Netsvayetayeva <i>et al</i> [64] | Ukraine/ healthy people                           | 245/ 99 (40.4)/ 9 (3.7)                           | 58 (58.6) | 53 (58.9) | 5 (55.6)  | NT                      | NT                                                                       |

NT, not tested.

NR, tested but not reported.

ST, Sequence Type.

CC, Clonal Complex

ND, Not detected (after testing)

**Supplementary Table S6.** Molecular typing of *S. aureus* isolated from the nasal cavity of healthy humans with or without occupational risks of colonization (Groups A-D).

NT: not tested.

NR: tested but not reported.

ST: Sequence Type.

CC: Clonal Complex

ND: Not detected (after testing)

| Author (s)<br>(reference)                                                                                  | Country/Subjects               | No. of samples /No. of<br><i>S. aureus</i> positive<br>cases (%) / No. of<br>MRSA (%) | <i>spa</i> types/ predominant, n (%) in<br>MSSA isolates                                                                                                                                                                                                                                                    | ST pattern/ predominant,<br>n (%) MSSA all isolates                                                                                    | CC pattern/<br>predominant, n (%) in<br>MSSA isolates                                                                       | <i>spa</i> types/ predominant, n<br>(%) in MRSA | ST pattern/ predominant,<br>n (%) in MRSA       | CC pattern/ predominant, n<br>(%) in MRSA |
|------------------------------------------------------------------------------------------------------------|--------------------------------|---------------------------------------------------------------------------------------|-------------------------------------------------------------------------------------------------------------------------------------------------------------------------------------------------------------------------------------------------------------------------------------------------------------|----------------------------------------------------------------------------------------------------------------------------------------|-----------------------------------------------------------------------------------------------------------------------------|-------------------------------------------------|-------------------------------------------------|-------------------------------------------|
| <b>Healthy population without reported occupational risk of nasal staphylococci colonization (Group A)</b> |                                |                                                                                       |                                                                                                                                                                                                                                                                                                             |                                                                                                                                        |                                                                                                                             |                                                 |                                                 |                                           |
| Lozano <i>et al</i><br>[67]                                                                                | Spain/ Healthy persons         | 278/ 53 (19.1)/ 1<br>(0.36) MRSA                                                      | t002, t008, t012, t018, t021, t084,<br>t091, t122, t127, t159, t190, t207,<br>t209, t216, t228, t233, t270, t342,<br>t331, t375, t548, t571, 1 (1.9),<br>706, t985, t1008, t1318, t1451, 1<br>(1.9), t1641, t2147, t2949, t5955,<br>t6092, t6287, t6288, t6289, t6647<br>/ t012, 6 (11.3) and t002, 5 (9.4) | ST30, ST34, ST1731,<br>ST509, ST1498, ST59,<br>ST1141, ST121,<br>ST398, 2 (6.7), ST97,<br>ST12,<br>ST121, ST1, ST5 /<br>ST30, 9 (16.9) | CC30, CC509, CC8,<br>CC59, CC109, CC121,<br>CC398, 2 (3.8), CC97,<br>CC12, CC1, CC5,<br>CC15, CC7, CC45/<br>CC30, 17 (32.1) | t7701, 1                                        | ST1649, 1                                       | CC6, 1                                    |
| Yan <i>et al</i> [49]                                                                                      | China/Healthy adults           | 2448/ 403 (16.3)/ 8<br>(0.3)                                                          | 77 <i>spa</i> types detected/ t571, 44<br>(10.9) and t189, 40 (9.9)                                                                                                                                                                                                                                         | ST398, ST2139<br>ST6, ST2114, ST7<br>ST45, ST59, ST2148,<br>ST211, ST25, ST123,<br>ST22/ ST398, 44 (10.9)                              | CC398<br>CC1, C7, CC45,<br>CC59, CC88, CC6,<br>CC22, CC121, CC5/<br>CC398, 44 (10.9)                                        | t034, t2431, t437, t116 /<br>t034, 2 (25/0)     | ST398, ST2799, ST59,<br>ST45 / ST398, 2 (25.0%) | CC398, CC59, CC45 /<br>CC398, 2 (25.0)    |
| El-Mahdy <i>et al</i> [39]                                                                                 | Saudi Arabia/Healthy<br>adults | 70/26 (37.1)/ 1 (1.4)<br>MRSA                                                         | t084, t131, t1328, t274, t065,<br>t688, t002, t024, t267, t128,<br>t5078, t5078, t937, t304, t349,<br>t355, t159/ t084, 8 (30.7)                                                                                                                                                                            | ST80, ST2196, ST291,<br>ST789, ST152, ST2816/<br>ST80, 3 (11.5)                                                                        | CC15, CC80, CC22,<br>CC30, CC45, CC5,<br>CC8, CC97, CC1,<br>CC101, CC22, CC121/<br>CC15, 8 (30.7)                           | t128 (1)                                        | NT                                              | CC1 (1)                                   |
| Muthukrishna<br>n <i>et al</i> [68]                                                                        | USA /Healthy persons           | 109/61 (55.9) / 7<br>(11.5)                                                           | t334, t008, t037, t012, t1705,<br>t189, t954, t002, t216, t3682, t209<br>/ t008, 10 (24.4) in both<br>intermittent and persistent carriers                                                                                                                                                                  | ST5, ST8, ST15, ST18,<br>ST30, ST45, ST59 /<br>ST5, 12 (29.3) in both<br>intermittent and<br>persistent carriers                       | NR                                                                                                                          | NR                                              | ST5, ST8, ST15, ST30,<br>ST87/ ST30, 3 (42.9)   | NR                                        |
| Ritchie <i>et al</i><br>[57]                                                                               | Germany/Healthy<br>students    | 122/ 69 (57.0)/ NT                                                                    | Data of <i>S. aureus</i><br>43 <i>spa</i> types of 69 isolates: t002,<br>t019, t091, t127, t189, t224, t732,<br>t3182, t1497, t709, t359, t065,<br>t363, t092, t4224, t338, t148,<br>t548, t1084, t359 and others/ t189<br>(12 episodes), t002 (9), t127 /<br>and t019, t091 and t224 (3).                  | NT                                                                                                                                     | NT                                                                                                                          | NT                                              | NT                                              | NT                                        |

|                              |                                |                                |                                                                                                                                                                                                                                                                                                                                             |                                                                                                                                                                                                                  |                                                                                                            |                                                                          |                      |                  |
|------------------------------|--------------------------------|--------------------------------|---------------------------------------------------------------------------------------------------------------------------------------------------------------------------------------------------------------------------------------------------------------------------------------------------------------------------------------------|------------------------------------------------------------------------------------------------------------------------------------------------------------------------------------------------------------------|------------------------------------------------------------------------------------------------------------|--------------------------------------------------------------------------|----------------------|------------------|
| Ebruke <i>et al</i> [38]     | Gambia/ Healthy villagers      | 600/ 151 (25.2)/ 0 (0.0)       | NR                                                                                                                                                                                                                                                                                                                                          | ST1, ST5, ST6, ST8, ST15, ST25, ST30, ST41, ST45, ST72, ST97, ST121, ST199, ST508, ST509, ST567, ST669, ST707, ST728, ST730, ST1004, ST1320, ST1472, ST1973 to ST2006/ ST15 (28 %) and ST5 (4 %) of 100 isolates | NT                                                                                                         | ND                                                                       | ND                   | ND               |
| Velasco <i>et al</i> [69]    | USA/ Healthy people            | 550/ 42 (7.6)/ 0 (0.0)         | NT                                                                                                                                                                                                                                                                                                                                          | ST5, ST15, ST30, ST34, ST39 and ST45                                                                                                                                                                             | ND                                                                                                         | ND                                                                       | ND                   | ND               |
| Wardyn <i>et al</i> [72]     | USA/ Healthy community members | 693/ 156 (22.5), 19 (2.7) MRSA | Among <i>S. aureus</i> (>90% MSSA) 118 <i>spa</i> types identified: t002, t034, t012, t338, t216, t571 and others/ t002, 33 (9.4%), t034 29 (8.3%)                                                                                                                                                                                          | ST398 and ST9/ ST398, 69 (50.4)                                                                                                                                                                                  | NR <sup>a</sup>                                                                                            | NR <sup>a</sup>                                                          | NR <sup>a</sup>      | NR <sup>a</sup>  |
| Gardella <i>et al</i> [79]   | Argentina/ Healthy children    | 316/ 98 (31.0)/ 14 (4.4)       | NT                                                                                                                                                                                                                                                                                                                                          | NT                                                                                                                                                                                                               | NT                                                                                                         | t002, t012, t127, t311, t2121 t2365 / t002, 5 (34.5), t313 (23%)         | ST5 in 3 (21.4) MRSA | NT               |
| Eibach <i>et al</i> [33]     | Ghana/ Healthy children        | 544/120 (22.1)/ 2 (0.34)       | t1096, t008 (3), t1123, t318, t363, t2147, t1172, t1299, t5047, t355, t84, t939, t157, t4454 , t939/ t355, 25 (20.3)                                                                                                                                                                                                                        | ST121, ST15, ST30, ST152, ST45, ST707, ST508, ST577, ST8, ST88/ ST 152, 36 (21.6)                                                                                                                                | CC121, CC15, CC30, CC152, CC45, CC707, CC508, CC8, CC88/ CC152, 36 (21.6), CC15, 21(17.8), CC45, 19 (15.2) | t1096, t4454                                                             | ST45, ST152          | CC152, CC45      |
| Ngoa <i>et al</i> [35]       | Gabon/ Healthy community       | 205/ 60 (29.3)/ 1 (0.49)       | t148 (5%), t279 (4%), t1510 (4%), t127 (4%), t1045 (4%), t002 (4%), t355 (3%) and t2723 (2%)/ t084, 23 (38.3)                                                                                                                                                                                                                               | ST5, ST9, ST6, ST8, ST27, ST1, ST15, ST88, ST25, ST30, ST345, ST508/ ST15, 23 (38.3)                                                                                                                             | CC5, CC 6, CC 9, CC8, CC15, CC25, CC30, CC101, CC121, CC152/ CC84 23 (38.3)                                | t729                                                                     | ST88                 | CC88             |
| Mehraj <i>et al</i> [61]     | Germany / healthy people       | 389/85 (21.9)/5 (1.3)          | t084, t091, t254, t360, t368, t491, t499, t4508, t015, t073, t550, t772, t2277, t13383, t005, t032, t1433, t1862, t012, t018, t019, t021, t275, t330, t706, t2275, t6311, t002, t242, t1265, t304, t2032, t11363, t056, t7760, t13588, t159, t160, t537, t1057, t1541, t2313, t3741, t5337, t7088, t10983, t13449, t13587/ t012 , 16 (20.0) |                                                                                                                                                                                                                  | CC15, CC30, CC45, CC22, CC5, CC8, CC101/ CC30, 16 (20.0)                                                   | t025, t032/ t025, 4 (80.0)                                               | NT                   | CC 22, 5 (100.0) |
| den Heijer <i>et al</i> [62] | Austria/ health people         | 3309/549 (16.6)/ 8 (0.2)       | NT                                                                                                                                                                                                                                                                                                                                          | NT                                                                                                                                                                                                               | NT                                                                                                         | t003, t005, t008, t010, t015, t034, 1 (12.5), t127                       | NT                   | NR               |
| den Heijer <i>et al</i> [62] | Belgium/ healthy people        | 3025/584 (19.3)/12 (0.4)       | NT                                                                                                                                                                                                                                                                                                                                          | NT                                                                                                                                                                                                               | NT                                                                                                         | t008, t011, 2 (16.7), t038, t062, t231, t447 (n=3), t1923, t2346, t10847 | NT                   | NR               |

|                                        |                                             |                           |                                                                                                                                                                                                                           |                                                                                                                                |                                                                                                |                                                                                                      |                                    |                 |
|----------------------------------------|---------------------------------------------|---------------------------|---------------------------------------------------------------------------------------------------------------------------------------------------------------------------------------------------------------------------|--------------------------------------------------------------------------------------------------------------------------------|------------------------------------------------------------------------------------------------|------------------------------------------------------------------------------------------------------|------------------------------------|-----------------|
| den Heijer <i>et al</i> [62]           | Croatia/ healthy people                     | 3960/792 (20.0)/15 (0.4)  | NT                                                                                                                                                                                                                        | NT                                                                                                                             | NT                                                                                             | t002, t003, t005, t011, 1(6.7), t014, t015, t045, t050, t127, t330, t535, t550, t2018, t5933, t10807 | NT                                 | NR              |
| den Heijer <i>et al</i> [62]           | France/ healthy people                      | 3858/876 (22.7)/16 (0.4)  | NT                                                                                                                                                                                                                        | NT                                                                                                                             | NT                                                                                             | t002, t008, t010, t121, t622, t681, t777, t2054, t5708                                               | NT                                 | NR              |
| den Heijer <i>et al</i> [62]           | Hungary/ healthy people                     | 3847/542 (14.1)/8 (0.2)   | NT                                                                                                                                                                                                                        | NT                                                                                                                             | NT                                                                                             | t002, t032, t127, t330, t1218                                                                        | NT                                 | NR              |
| den Heijer <i>et al</i> [62]           | Netherlands/ healthy people                 | 3847/1073 (27.9)/9 (0.2)  | NT                                                                                                                                                                                                                        | NT                                                                                                                             | NT                                                                                             | t011, 2 (22.2), t034, 1 (11.1), t038, t108, 1 (11.1), t267, t740, t1457, t10812                      | NT                                 | NR              |
| den Heijer <i>et al</i> [62]           | Spain/ healthy people                       | 3990/770 (19.3)/10 (0.3)  | NT                                                                                                                                                                                                                        | NT                                                                                                                             | NT                                                                                             | t002 (n=2), t022, t230, t846, t1081, t1203, t1610, t10814                                            | NT                                 | NR              |
| den Heijer <i>et al</i> [62]           | Sweden/ healthy people                      | 3214/958 (29.8)/ 0 (0.0)  | NT                                                                                                                                                                                                                        | NT                                                                                                                             | NT                                                                                             | ND                                                                                                   | ND                                 | ND              |
| den Heijer <i>et al</i> [62]           | UK/ healthy people                          | 3156/814 (25.8)/13 (0.4)  | NT                                                                                                                                                                                                                        | NT                                                                                                                             | NT                                                                                             | t002, t020, t025, t032, t127 (n=2), t223, t852, t1214, t2436, t5414, t7922                           | NT                                 |                 |
| Becker <i>et al</i> [63]               | Germany/ healthy population                 | 1878/920 (40.9)/15 (0.8)  | 331 spa types with t084 (n = 104; 7.7%), t091 (n = 83; 6.1%), t012 (n = 71; 5.2%) and t015 (n = 56; 4.1%) being predominant. In addition, t011 (n = 3), t034 (n = 5), t1451 (n = 4) and or t3423 (n = 1) were identified. | NT                                                                                                                             | NR                                                                                             | t003, t011, t084, t127, t230, t469 , t670, t159, t009/ t011, 4 (26.7)                                | NT                                 | NR              |
| Pires <i>et al.</i> [74]               | Brazil/ Healthy community                   | 686/224 (32.7)/ 6 (0.9)   | NT                                                                                                                                                                                                                        | NR                                                                                                                             | NR                                                                                             | t002 and t021/ t002, 5 (83.3)                                                                        | ST5, ST1176, ST2594/ ST5, 4 (66.7) | NT              |
| Karapsias <i>et al</i> [59]            | Greece/ Healthy Air force staff             | 959/ 9 (0.94) MRSA        | NT                                                                                                                                                                                                                        | NT                                                                                                                             | NT                                                                                             | t012 t018, t044, t046, t1051/ t012, 3 (33.3)                                                         | NT                                 | NT              |
| <b>Healthy Food Handlers (Group B)</b> |                                             |                           |                                                                                                                                                                                                                           |                                                                                                                                |                                                                                                |                                                                                                      |                                    |                 |
| Cuny <i>et al</i> [110]                | Germany/ Butchers, meat sellers, and cooks  | 286/ 130 (21.5)/ 2 (0.33) | 52 spa-types detected: t084, t091, t005, t008, t002, t127, t012, t015, t073, t346, t571 (2), t1451 (2) / t084, 35 (26.9) and t091, 35 (26.9)                                                                              | ST182                                                                                                                          | CC1, CC5, CC7, CC8, CC9, CC15, CC22, CC30, CC34, CC101, CC121, CC398, 4 (3.1)/ CC22, 21 (16.2) | t032, 2 (100.0)                                                                                      | ST21, 2 (100.0)                    | CC22, 2 (100.0) |
| Ho <i>et al</i> [102]                  | Hong Kong/ Raw and/or cooked foods handlers | 434/ 99 (22.8)/ 5 (1.15)  | 42 spa types detected: t188, t127, t034, 3 (3.2), t3625, t091, t1081, t338, t304, t843 and others/ t188, 17 (17.2%)                                                                                                       | ST15, ST7, ST251, ST239, ST45, ST30, ST5, ST8, ST6, ST1, ST398, 4 (4.2), ST96, ST188, ST37, ST9, ST59, ST130/ ST188, 17 (18.1) | NT                                                                                             | t1081, t4189/ t1081, 4 (80.0)                                                                        | ST45, 3 (60.0)                     | NT              |

|                                         |                                        |                            |                                                                                                                                                                                   |                                                                                                                                                                       |                                                                                                              |                                                                          |                                                                  |                                                 |
|-----------------------------------------|----------------------------------------|----------------------------|-----------------------------------------------------------------------------------------------------------------------------------------------------------------------------------|-----------------------------------------------------------------------------------------------------------------------------------------------------------------------|--------------------------------------------------------------------------------------------------------------|--------------------------------------------------------------------------|------------------------------------------------------------------|-------------------------------------------------|
| Uzunovic <i>et al</i> [106]             | Bosnia and Herzegovina/ Food handlers  | 13690/ 189 (1.4)/ 3 (0.02) | 66 spa-types reported. Including t005, t091, t015 and t008, t159, t012, t021, t267 and t010/ t005, 20 (10.7)                                                                      | ST45, ST22, ST121, ST5, ST8, ST15, ST30, ST7, ST1, ST1, ST3/ ST45, 41 (22.0)                                                                                          | CC015, CC192, CC159, CC02, CC084, CC008, CC024, CC021, CC012/ CC015, 41 (22.0)                               | t355 (2), t595 (1)                                                       | ST152 (3)                                                        | CC355/CC595 (3)                                 |
| Leibler <i>et al</i> [111]              | USA / Healthy Beef-packing workers     | 137/ 37 (27.0)/ 5 (3.6)    | t021, t065, t078, t189, t276, t304, t458, t571, 1 (3.1), t688, t701, t992, t1250, t3182, t4298, t4976, t6150, t002, t008, t024, t338, t748, t1248, t1476, t2379/ t1248 , 4 (12.5) | NT                                                                                                                                                                    | NT                                                                                                           | t002, t008 and t024/ t008, 2 (40.0) and t024, 2 (40.0)                   | NT                                                               | NT                                              |
| Aung <i>et al</i> [115]                 | Burma/ food handlers                   | 563 / 110 (19.5)/ 0 (0.0)  | NT                                                                                                                                                                                | ST88, ST683, ST45, ST1930, ST3206, ST1, ST672, ST6, ST2641, ST2885, ST59, ST15, ST8, ST5, ST779, ST508, ST3371, ST3206/ ST1930, 12 (38.7) out of 31 selected isolates | CC88, CC8, CC45, CC96, CC1, CC672, CC6, CC59, CC15, CC5, CC779 / CC96, 11 (35.4) out of 31 selected isolates | ND                                                                       | ND                                                               | ND                                              |
| Boost <i>et al</i> [98]                 | Hong Kong/ Pork Butchers               | 300/ 17 (5.6) MRSA         | NR                                                                                                                                                                                | NR                                                                                                                                                                    | NR                                                                                                           | t701, t008, t002, t123, t359/ t701, 5 (29.4)                             | NT                                                               | CC6, CC8 CC5, CC97, CC45/ CC6, 5 (29.4)         |
| <b>Healthy Veterinarians (Group C)</b>  |                                        |                            |                                                                                                                                                                                   |                                                                                                                                                                       |                                                                                                              |                                                                          |                                                                  |                                                 |
| Boost <i>et al</i> [139]                | Hong Kong/ veterinary personnel        | 150 / 1 (0.7) MRSA         | NT                                                                                                                                                                                | NT                                                                                                                                                                    | NT                                                                                                           | t701                                                                     | NT                                                               | CC6                                             |
| Zhang <i>et al</i> [119]                | China/ Veterinary personnel            | 51/ 1 (1.9) MRSA           | NT                                                                                                                                                                                | NT                                                                                                                                                                    | NT                                                                                                           | t437                                                                     | ST59                                                             | NT                                              |
| Kittl <i>et al</i> [121]                | Switzerland / veterinarians            | 212/ 14 (6.6) MRSA         | NT                                                                                                                                                                                | NT                                                                                                                                                                    | NT                                                                                                           | t011, t118, t17424, t038, t133, t034, t899, t5634, t1510/ t011, 8 (57.1) | ST398, ST225, ST8, ST22, ST45 / ST398, 8 (57.1)                  | NT                                              |
| Huber <i>et al</i> [122]                | Switzerland / veterinarians            | 133/ 4 (3.0) MRSA          | NT                                                                                                                                                                                | NT                                                                                                                                                                    | NT                                                                                                           | t127, t011, t064/ t011, 2 (50.0)                                         | ST398, ST8/ ST398, 3 (75.0)                                      | NT                                              |
| Wulf <i>et al</i> [124]                 | Denmark/ Veterinarians                 | 272/ 34 (12.5) MRSA        | NT                                                                                                                                                                                | NT                                                                                                                                                                    | NT                                                                                                           | t011, t034, t108, t571, t567, t899/ t011, 15 (44.1)                      | ST398, 34 (100.0)                                                | CC398, 34 (100.0)                               |
| Neradova <i>et al</i> [135]             | Czech Republic/ veterinary personnel   | 134 / 9 (6.7) MRSA         | NT                                                                                                                                                                                | NT                                                                                                                                                                    | NT                                                                                                           | t011, t034, t003, t2330 / t011, 6 (66.7)                                 | ST398, ST225, ST4894/ ST398, 7 (77.9)                            | CC398 in 8 (88.9%) (CC11- <i>spa</i> type)      |
| Žemličková <i>et al</i> [127]           | Czech Republic/ veterinary personnel   | 280/2 (0.7) MRSA           | NT                                                                                                                                                                                | NT                                                                                                                                                                    | NT                                                                                                           | t012, t026                                                               | ST30, ST45                                                       | NT                                              |
| Wettstein-Rosenkranz <i>et al</i> [123] | Switzerland/ veterinary care providers | 369/14 (3.4) MRSA          | NT                                                                                                                                                                                | NT                                                                                                                                                                    | NT                                                                                                           | t011, t003, t014, t002, t283, t186/ t011, 4 (28.6)                       | ST398, ST225, ST5, ST88/ ST398, 4 (28.6)                         | NT                                              |
| Paterson <i>et al</i> [136]             | UK/ cattle veterinary practitioners    | 307/ 8 (2.6) MRSA          | NT                                                                                                                                                                                | NT                                                                                                                                                                    | NT                                                                                                           | t032, t011, t008, t216, t879/ t032, 3 (37.8)                             | ST22, ST398, 1 (12.5) ST2274, ST2014, ST8, ST59 / ST22, 3 (37.8) | CC22, CC398, CC2014, CC8, CC59 / CC22, 4 (50.0) |

|                                            |                                                 |                                                                                   |                                                                                                  |                                                                                                                                                               |                                                                                                                                                                                                                                                                 |                                                                     |                                                                   |                                                                  |
|--------------------------------------------|-------------------------------------------------|-----------------------------------------------------------------------------------|--------------------------------------------------------------------------------------------------|---------------------------------------------------------------------------------------------------------------------------------------------------------------|-----------------------------------------------------------------------------------------------------------------------------------------------------------------------------------------------------------------------------------------------------------------|---------------------------------------------------------------------|-------------------------------------------------------------------|------------------------------------------------------------------|
| Anderson <i>et al</i> [132]                | USA/ veterinary personnel                       | 257 / 26 (10.1) MRSA                                                              | NT                                                                                               | NT                                                                                                                                                            | NT                                                                                                                                                                                                                                                              | t002, t067, t985, t064, t451, t622 / t064, 9 (34.6) and t002 (23.1) | NT                                                                | NT                                                               |
| Worthing <i>et al</i> [134]                | Australia/ healthy veterinary personnel         | 46 / 4(8.7) MRSA                                                                  | NR                                                                                               | NR                                                                                                                                                            | NR                                                                                                                                                                                                                                                              | t316, t441, t177, t976                                              | ST59, ST336, ST81/ ST59, 2(50.0)                                  | NT                                                               |
| <b>Healthy Livestock Farmers (Group D)</b> |                                                 |                                                                                   |                                                                                                  |                                                                                                                                                               |                                                                                                                                                                                                                                                                 |                                                                     |                                                                   |                                                                  |
| Adesida <i>et al</i> [144]                 | Nigeria/ farm personnel (cow, sheep, goat, pig) | 50/ 28 (56.0)/ 3 (6.0)                                                            | t084, t091, t1045, t127, t939, t311, t786, t1154/ t1045, 4 (14.3) and t091, 4 (14.3)             | NT                                                                                                                                                            | NT                                                                                                                                                                                                                                                              | t786, 3 (100.0)                                                     | NT                                                                | NT                                                               |
| Fan <i>et al</i> [155]                     | China/ livestock workers                        | 1162/ 108 (9.3)/ 16 (1.4)                                                         | NT                                                                                               | ST217, ST8, ST398, 3 (3.3), ST72, ST2339, ST15, ST1863, ST45, ST2238, ST43, ST95, ST2239, ST10, ST1, ST6, ST5, ST188, ST59, ST7, ST951, ST10 / ST7, 17 (18.5) | CC217, CC8, CC398, 3 (3.3), CC72, CC2339, CC15, CC5, CC45, CC2238, CC43, CC95, CC1917, CC10, CC1, CC6, CC188, CC59, CCT7, CC59, CC10 / CC7, 17 (18.5)                                                                                                           | NT                                                                  | ST5, ST188, ST398, 1 (6.3), ST59, ST7, ST951, ST10/ ST7, 7 (43.8) | CC5, CC188, CC59, CC7, CC59, CC398, 1 (6.3), CC10/ CC7, 7 (43.8) |
| Ye <i>et al</i> [156]                      | China/ Pig workers                              | 244/ 37(15.2)/ 26 (10.7)                                                          | NT                                                                                               | ST7, ST943, ST6, ST188, ST15, ST45, ST88/ ST7, 5 (45.5)                                                                                                       | CC7, CC6, C188, CC15, CC45, CC88/ CC7, 5 (45.5)                                                                                                                                                                                                                 | NT                                                                  | ST 188, ST7, ST9/ ST9, 16 (43.2)                                  | CC188, CC7, CC9/ CC9, 16 (43.2)                                  |
| Etter <i>et al</i> [163]                   | Switzerland / livestock famers                  | 160 (87 pupils and 73 members of farmer families)<br><br>73 (45.6)/ 2 (1.25) MRSA | NT                                                                                               | NT                                                                                                                                                            | In pupils:<br><br>CC6, CC12, CC152, CC188, CC5, CC7, CC8, CC59, CC9, CC398, 3 (7.9)/ CC45, 11 (12.6) and CC15, 10 (11.5)<br><br>In family members<br>CC1, CC22, CC101, CC121, CC182, CC5, CC7, CC8, CC59, CC97, CC361, and CC509/ CC30 (n = 9) and CC45 (n = 5) | NT                                                                  | NT                                                                | CC8 and CC30 in pupils                                           |
| Bunke <i>et al</i> [172]                   | Germany/ pig farmers                            | 86 / 54 (62.8)/ 18 (20.9)                                                         | t011, t034, t160, , t337, t012, t588, t065, t4755, t084, t16215/ t034, 4 (12.5)                  | NT                                                                                                                                                            | CC398, 5 (10.2)                                                                                                                                                                                                                                                 | t011, t034, t4652/ t011, 12 (70.6)                                  | NT                                                                | CC398, 18 (100.0)                                                |
| Mroczkowska <i>et al</i> [125]             | Poland /pig farmers                             | 283/ 50 (17.7)/ 4 (10.5) MRSA                                                     | t057, t108, 1 (2.2), t034, t4387, t2582, t1928, t1793, t318, t334, t2462, t1430/ t034, 14 (30.4) | NT                                                                                                                                                            | CC5, CC8, CC15, CC398, CC182/ CC398, 33 (71.7)                                                                                                                                                                                                                  | t034, t1430/ t034, 3 (75.0)                                         | NT                                                                | CC30, CC398/ CC398, 3 (75.0)                                     |
| Neyra <i>et al</i> [182]                   | USA/ hog plant workers                          | 162/ 35 (21.6)/9 (5.6) MRSA                                                       | NT                                                                                               | 19 unique STs<br><br>ST1, ST5, ST8, ST15, ST34, ST45, ST72, ST97, ST398, 3 (11.5),                                                                            | NT                                                                                                                                                                                                                                                              | NT                                                                  | ST8, ST1/ ST8, 4 (44.4)                                           | NT                                                               |

|                                |                                                                                            |                                                                                                               |                                                                                                                         |                                                                                                            |                                                                                                           |                                                                                  |                                                                  |                              |
|--------------------------------|--------------------------------------------------------------------------------------------|---------------------------------------------------------------------------------------------------------------|-------------------------------------------------------------------------------------------------------------------------|------------------------------------------------------------------------------------------------------------|-----------------------------------------------------------------------------------------------------------|----------------------------------------------------------------------------------|------------------------------------------------------------------|------------------------------|
|                                |                                                                                            |                                                                                                               |                                                                                                                         | ST508, ST1150/ ST8, 6 (23.1)                                                                               |                                                                                                           |                                                                                  |                                                                  |                              |
| Hatcher <i>et al</i> [183]     | USA/ hog Operation Workers                                                                 | 198/105 (53.0)/ 32 (16.6) MRSA                                                                                | t034, 2 (2.7), t189, t1077, t1937, t337, t688, t008, t015, t493, t2949, t185, t089, t002/ t688, 11 (15.1)               | ST5, ST8, ST188, ST398, 2 (2.7), ST45, ST30, ST50/ ST5 12 (16.4)                                           | CC9, CC398, 2 (2.7)/ CC9 (NR)                                                                             | 6 MRSA isolates t002, 2; t008, 2 and t088, 2                                     | ST5, 2; ST8, 4                                                   | NR                           |
| Rinsky <i>et al</i> [184]      | USA/ industrial livestock operation and antibiotic-free livestock operation workers (pigs) | 99 versus 105/ 41 (41.0)/ 3 (3.0) versus 42 (40.0)/ 3 (2.9)                                                   | NT                                                                                                                      | ST1, ST5, ST8, ST9, ST30, ST45, ST182, ST188, ST2551, ST2546, ST97, and ST398, 10 (11.5) / ST30, 18 (21.7) | CC1, CC5, CC8, CC9, CC30, CC45, CC30, CC182, CC97, and CC398, 10 (11.5) / CC30, 18 (21.7)                 | NT                                                                               | ST30, ST398/ ST398, 4 (66.7)                                     | CC30, CC398/ CC398, 4 (66.7) |
| Okorie-Kanu <i>et al</i> [145] | Nigeria/ chicken and pig slaughterhouses workers.                                          | 45 each from chicken and pig slaughterhouses workers.<br><br><i>S. aureus</i> (MSSA): 5 (11.1) versus 3 (6.7) | Pig carcass handlers: t311 and t279/ t311, 2 (66.7)<br><br>Chicken carcass handlers: t084, t311, t18346/ t084, 3 (60.0) | NT                                                                                                         | Pig carcass handlers: CC5, CC15/ CC5, 2 (66.7)<br><br>Chicken carcass handlers: CC5, CC15/ CC15, 3 (60.0) | ND                                                                               | ND                                                               | ND                           |
| Khanna <i>et al</i> [186]      | Canada/ Pig farmers                                                                        | 25/ 5 (20.0) MRSA                                                                                             | NR                                                                                                                      | NR                                                                                                         | NR                                                                                                        | t1255, t034, t002/ t034, 3 (60.0)                                                | NT                                                               | CC398, 3 (60.0)              |
| Kittl <i>et al</i> [121]       | Switzerland / animal farmers (pigs)                                                        | 156/ 8 (5.1) MRSA                                                                                             | NR                                                                                                                      | NR                                                                                                         | NR                                                                                                        | t034, t1510, t899, 1 (12.5)/ t034, 5 (62.5)                                      | ST22, ST45, ST398/ ST398, 6 (75.0)                               | CC398, 6 (75.0)              |
| Mascaro <i>et al</i> [179]     | Italy/ sheep farmers                                                                       | 275/ 3 (1.1) MRSA                                                                                             | NR                                                                                                                      | NR                                                                                                         | NR                                                                                                        | NT                                                                               | NT                                                               | CC1, CC30, CC22              |
| Graveland <i>et al</i> [180]   | Netherlands/ veal Calf Farmers                                                             | 97/ 32 (33.0) MRSA                                                                                            | NR                                                                                                                      | NR                                                                                                         | NR                                                                                                        | t002, t011, t015, t084, t108, t166, t899, t1457, t2383/ t011 (NR)                | ST5, ST398, ST45, ST34/ ST398, 28 (87.5)                         | NT                           |
| Smith <i>et al</i> [185]       | USA/ pig farm workers                                                                      | 148/31 (20.9) MRSA                                                                                            | NR                                                                                                                      | NR                                                                                                         | NR                                                                                                        | t002, t011, t021, t034, t084, t179, t330, t688/ t034, 20 (64.5)                  | ST398, 21 (67.7)                                                 | CC398, 21 (67.7)             |
| Sahibzada <i>et al</i> [187]   | Australia/ Pig farmers                                                                     | 52/ 31 (59.6) MRSA                                                                                            | NR                                                                                                                      | NR                                                                                                         | NR                                                                                                        | NT                                                                               | ST93 and ST398, 5 (16.1)/ ST93, 26 (84.0)                        | NT                           |
| Moon <i>et al</i> [152]        | Korea/ Pig farmers                                                                         | 126/ 21 (16.7) MRSA                                                                                           | NR                                                                                                                      | NR                                                                                                         | NR                                                                                                        | t034, t8588, t189, t324, t664/ t034, 10 (47.1)                                   | ST541, ST398, 4 (19.0) ST541, ST188, ST72, ST72/ ST541, 6 (28.6) | CC398, 10 (47.1)             |
| Cui <i>et al</i> [154]         | China/ Pig workers                                                                         | 120/ 2 (1.7) MRSA                                                                                             | NR                                                                                                                      | NR                                                                                                         | NT                                                                                                        | t899 in both                                                                     | ST9 in both                                                      | NT                           |
| Back <i>et al</i> [165]        | Korea/ pig farm workers                                                                    | 186/ 6 (3.6) MRSA                                                                                             | NR                                                                                                                      | NR                                                                                                         | NR                                                                                                        | t18103, 1 (16.7) t034, 1 (16.7), t664, t5440/ t664, 2 (33.3) and t5440, 2 (33.3) | ST2084, ST541, 1 (16.7), ST398, 1 (16.7)/ ST2084, 4 (66.7)       | CC398 2, (16.7)              |
| Dahms <i>et al</i> [174]       | Germany/ pig farmers                                                                       | 78/ 20 (25.6) MRSA                                                                                            | NR                                                                                                                      | NR                                                                                                         | NR                                                                                                        | t011, t034, t1451, t2370, t10721, t3275 / t034, 6 (30.0)                         | NT                                                               | All were CC398               |
| Reynaga <i>et al</i> [181]     | Spain/ pig farm workers                                                                    | 140/ 81 (57.9) MRSA                                                                                           | NR                                                                                                                      | NR                                                                                                         | NR                                                                                                        | t011, t034, t1456, t1451, t108, t943, t1197, t2346/ t011, 54 (67.9)              | ST398 in all isolates                                            | NT                           |

|                                 |                                         |                        |    |    |    |                                                                          |                                                                  |                                                          |
|---------------------------------|-----------------------------------------|------------------------|----|----|----|--------------------------------------------------------------------------|------------------------------------------------------------------|----------------------------------------------------------|
| Normanno <i>et al</i> [161]     | Italy/ pigs and abattoir workers        | 113/ 9 (7.9) MRSA      | NR | NR | NR | NT                                                                       | ST1, ST2794, ST8, ST15, ST398/ ST1, 3 (33.3) and ST398, 3 (33.3) | CC1, CC8, CC15, CC398/ CC1, 3 (33.3) and CC398, 3 (33.3) |
| Sinlapasorn <i>et al</i> [188]  | Thailand/ Pig farmers                   | 98 / 3 (3.1) MRSA      | NR | NR | NR | NT                                                                       | ST764, ST9/ ST9, 2 (66.7)                                        | NT                                                       |
| Kock <i>et al</i> [175]         | Germany/ pig farmers                    | 35/ 27 (77.1) MRSA     | NR | NR | NR | t011, t034, t1451, t1197 / t011, 16 (59.3)                               | NT                                                               | All were CC398                                           |
| Parisi <i>et al</i> [167]       | Italy/ pig farm worker                  | 150/NR/ 26 (17.5)      | NR | NR | NR | t011,6 (23.1), t034, t1730, t899, 6 (23.1), t1939, t002/ t034, 10 (38.5) | ST398, ST79, ST9, ST1, ST5/ ST398, 22 (84.6)                     | CC9, 1 (3.8), CC398, 22 (84.6)                           |
| Papadopoulos <i>et al</i> [166] | Greece/ Dairy workers                   | 26/10 (38.5) /2 (7.7)  | NT | NR | NR | t021, t127                                                               | NT                                                               | NT                                                       |
| Kalayu <i>et al</i> [148]       | Ethiopia/ Dairy farmers                 | 71/22 (31.0)/ 1 (1.4)  | NT | NT | NT | t064                                                                     | NR                                                               | CC8                                                      |
| Sakwinska <i>et al</i> [168]    | Switzerland /Bovine farmers             | 158/57 (36)/ 2 (1.3)   | NT | NT | NT | t011, 2 (100)                                                            | ST398, 2 (100)                                                   | NT                                                       |
| VAN CLEEF <i>et al</i> [164]    | Netherlands/ pig slaughterhouse workers | 249/ NR/14 (5.6)       | NR | NR | NR | t011, t034 1 (7.1), and t1451, 1 (7.1), t108, 1 (7.1) / t011, 11 (78.6)  | NT                                                               | All were CC398                                           |
| Odetokun <i>et al</i> [146]     | Nigeria/ Pig workers                    | 260/35 (13.5)/ 8 (3.1) | NR | NR | NR | t091, t1937, t816, t4235, t16571/ t091, 3 (37.5)                         | NT                                                               | NT                                                       |
| Otalu <i>et al</i> [147]        | Nigeria/ Pig workers                    | 55/NR/ 6 (10.9)        | NR | NR | NR | t1603, 8 (100.0)                                                         | ST88                                                             | NT                                                       |

**Supplementary Table S7.** Study characteristics, species, and antimicrobial resistance profile of non-*aureus* staphylococci nasal carriage in healthy people with or without risk of colonization (Groups A-D).

| Author (s)<br>(Reference) | Staphylococci group | Continent | Country/Subjects | Study design | Sample size | No. of staphylococcal positive cases (%) | Detection method | <i>Staphylococcus</i> species (non- <i>aureus</i> ) detected (%) <sup>b</sup> | Antimicrobial Resistance phenotype Technique/ Major resistant types <sup>c</sup> | Antimicrobial Resistance genes |
|---------------------------|---------------------|-----------|------------------|--------------|-------------|------------------------------------------|------------------|-------------------------------------------------------------------------------|----------------------------------------------------------------------------------|--------------------------------|
|---------------------------|---------------------|-----------|------------------|--------------|-------------|------------------------------------------|------------------|-------------------------------------------------------------------------------|----------------------------------------------------------------------------------|--------------------------------|

|                               |               |        |                                                   |                 |                 |            |                 |                                                                                                                                       |                                              |                                                   |
|-------------------------------|---------------|--------|---------------------------------------------------|-----------------|-----------------|------------|-----------------|---------------------------------------------------------------------------------------------------------------------------------------|----------------------------------------------|---------------------------------------------------|
| Abadi <i>et al</i> [82]       | CoPS and CoNS | Asia   | Iran/Healthy school students                      | Cross-sectional | 600             | 539 (89.8) | C / PCR         | SL (29), SHae(24) SSa(23.6), SE (12.5), SSli(11.1)<br><br>MR-isolates: 72 (16.7) MRCoNS were identified. SSa had the highest MR rate. | DD<br>FOX                                    | <i>mecA</i>                                       |
| Lebeaux <i>et al</i> [85]     | CoNS          | Europe | France /Healthy community                         | Cross-sectional | 154             | 72 (46.7)  | C / PCR / MT    | SE (21.4), SHae(27), SH (18.3), SSa(16.2), others(3)                                                                                  | NT                                           | ND                                                |
| Falomir <i>et al</i> [83]     | CoPS and CoNS | Europe | Spain/ Healthy older persons (average 63.7 years) | Cross-sectional | 27              | 4 (15.0)   | C               | Swa Spa, Skl, Sxy                                                                                                                     | DD<br>(CoNS)<br>PEN, OXA, TET, CLA, RIF, CIP | NT                                                |
| Falomir <i>et al</i> [84]     | CoPS and CoNS | Europe | Spain/ Healthy university students                | Cross-sectional | 445             | 99 (22.2)  | C               | Sin, Ssa, Skl, Swa, and Sca                                                                                                           | DD<br>OXA, ERY, MUP                          | NT                                                |
| Aung <i>et al</i> [115]       | CoPS          | Asia   | Burma/ food handlers                              | Cross-sectional | 563             | 110 (19.5) | C/ PCR/MT       | <i>Sarg</i> , 1 (0.8)                                                                                                                 | NT                                           | NR                                                |
| Boost <i>et al</i> [139]      | CoP           | Asia   | Hong Kong/ Veterinary personnel                   | 150             | Cross-sectional | NR         | C/PCR/MT        | Sps 2 (1.3)                                                                                                                           | NT                                           | <i>mecA</i>                                       |
| Malissiova <i>et al</i> [140] | CoNS          | Europe | Greece/ Healthy veterinary students               | 81              | Prospective     | 22 (27.2)  | C / PCR / MALDI | SHae(54), SW(45.8), SE (16.6), SPas (4.2) SCa (4.2).                                                                                  | DD<br>FOX                                    | <i>mecA</i> ( <i>S. epidermidis</i> )             |
| Paterson <i>et al</i> [136]   | CoPS and CoNS | Europe | UK/ cattle veterinary practitioners               | 307             | Cross-sectional | NR         | C/PCR/MT        | <i>SHae</i>                                                                                                                           | MIC<br>OXA, FOX, ERY, CLI, TET, SXT          | <i>tetM tetL aacA, aphD, dfrK ermC ermT, mecA</i> |

|                                |               |         |                                        |                                       |                         |                   |          |                                                                                                        |                                         |             |
|--------------------------------|---------------|---------|----------------------------------------|---------------------------------------|-------------------------|-------------------|----------|--------------------------------------------------------------------------------------------------------|-----------------------------------------|-------------|
| Paul <i>et al</i> [138]        | CoPS          | Europe  | Denmark/ small animal veterinarian     | 128                                   | Prospective             | NR                | C/PCR    | MRSP, 5 (3.9)                                                                                          | DD<br>FOX                               | <i>mecA</i> |
| Neradova <i>et al</i> [135]    | CoPS and CoNS | Europe  | Czech Republic/ Veterinary personnel   | 134                                   | Cross-sectional         | 40 (29.9)         | C/PCR/MT | Sps, 2 (1.5)                                                                                           | DD<br>FOX, CXT, TET, GEN, CIP           | <i>mecA</i> |
| Founou <i>et al</i> [189]      | CoNS          | Africa  | Cameroon and South Africa/ Pig workers | 53 in Cameroon and 24 in South Africa | Comparative prospective | ND                | C/PCR    | 50 (94,3) and 7 (29.2) MRS in Cameroon and South Africa receptively.<br><i>Sep, SHae, SL, Slut, SH</i> | DD<br>PEN, OXA, FOX, TET, SXT           | <i>mecA</i> |
| Sinlapasorn <i>et al</i> [188] | CoPS and CoNS | Asia    | Thailand/ Pig farmers                  | 98                                    | Cross-sectional         | 3 (3.1)           | C/PCR/MT | SSc,Shae, <i>S cohnii, subspecies urealyticus, S. hominis subspecies hominis</i> , SChr, SE            | MIC<br>OXA, FOX, GEN, ERY, TET, OF      | <i>mecA</i> |
| Rall <i>et al</i> [113]        | CoPS and CoNS | America | Brazil/ Food handlers                  | 62                                    | Cross-sectional         | 15 (22.1)         | C/PCR    | S.ep, Sw                                                                                               | NT                                      | NT          |
| Argudin <i>et al</i> [190]     | CoNS          | Europe  | Belgium/ farmers                       | 86                                    | Cross-sectional         | NR                | C/PCR/MT | Sep, 64 (75) MRSE, 44 (51.1)                                                                           | DD<br>PEN, FOX, CLI, KAN, TET, ERY, SXT | <i>mecA</i> |
| Roberts <i>et al</i> [191]     | CoPS and CoNS | America | USA/ healthy dairy farmers             | 24                                    | Cross-sectional         | 5 (20.8)          | C/PCR    | Sep, Shae, Shom, Ssci, Sxy                                                                             | NT                                      | NT          |
| Lim <i>et al</i> [158]         | CoPS and CoNS | Asia    | Korea/ Dairy farm workers              | 43                                    | Cross-sectional         | NR/ MRSA, 1 (2.3) | C/PCR/MT | MRCoNS, 1 (2.3)                                                                                        | <i>mecA</i>                             | NT          |

<sup>a</sup>C, culture; MALDI, MALDI-TOF-MS; PCR, PCR; MT, molecular typing.

<sup>b</sup>SE: *S. epidermidis*; SHae: *S. haemolyticus*; SSa: *S. saprophyticus*; SL: *S. lugdunensis*; SCa: *S. capitis*; SC: *S. cohnii*; SH: *S. hominis*; SHy: *S. hyicus*; SCs: *S. caseolyticus*; SSi: *S. simulans*; SD: *S. delphini*; SSli: *S. schleiferi* SW: *S. warnieri*; SPas: *S. pasteurii*, *S. pseudintermedius*; Sps; Schr: *S. chromogenes*; SSci: *S. sciuri*; Sin: *S. intermedius*; MRSP (methicillin-resistant *S. pseudintermedius*)

<sup>c</sup>Technique used: Disk-diffusion method (DD-method), MIC determination (MIC). Top 4 groups of antimicrobial agents: beta-lactams (BL). Fluoroquinolones (FQ), Macrolides (Mc), Tetracycline (Tet), Vancomycin (Van)

<sup>d</sup>NT: Not tested

NA: Not available (tested but result not published on article)

ND: Not detected

NR: Not reported in detail

PEN: Penicillin; AMX: Amoxicillin; ERY: Erythromycin; CHL: Chloramphenicol; CLI: Clindamycin; STR: Streptomycin; Van: vancomycin; TET: Tetracycline; OXA: Oxacillin; RIF: Rifampicin, FOX: Cefoxitin; LEV: Levofloxacin; CIP: Ciprofloxacin; KAN: Kanamycin; GEN: Gentamycin; MUP: Mupirocin; SXT: Trimethoprim/sulfamethoxazole.
